# Supplementary material for: Movement side effects of antipsychotic drugs in adults with and without intellectual disability: UK population-based cohort study
Source: PubMed Central journal article supplement (PMC5724123; doi:10.1136/bmjopen-2017-017406), 2017-08-03
Supplement: bmjopen-2017-017406.draft_revisions.pdf [file bmjopen-2017-017406.draft_revisions.pdf]

# BMJ Open

## Movement side-effects of antipsychotic drugs in adults with intellectual disability: cohort study

|                                 |                                                                                                                                                                                                                                                                                                                                                                                                                                                                        |
|---------------------------------|------------------------------------------------------------------------------------------------------------------------------------------------------------------------------------------------------------------------------------------------------------------------------------------------------------------------------------------------------------------------------------------------------------------------------------------------------------------------|
| Journal:                        | <i>BMJ Open</i>                                                                                                                                                                                                                                                                                                                                                                                                                                                        |
| Manuscript ID                   | bmjopen-2017-017406                                                                                                                                                                                                                                                                                                                                                                                                                                                    |
| Article Type:                   | Research                                                                                                                                                                                                                                                                                                                                                                                                                                                               |
| Date Submitted by the Author:   | 24-Apr-2017                                                                                                                                                                                                                                                                                                                                                                                                                                                            |
| Complete List of Authors:       | Sheehan, Rory; University College London, Division of Psychiatry<br>Horsfall, Laura; University College London, Research Department of Primary Care and Population Health<br>Strydom, Andre; Division of Psychiatry<br>Osborn, David; University College London, Division of Psychiatry<br>Walters, Kate; University College London, Research Department of Primary Care and Population Health<br>HASSIOTIS, ANGELA; University College London, Division of Psychiatry |
| <b>Primary Subject Heading</b>: | Mental health                                                                                                                                                                                                                                                                                                                                                                                                                                                          |
| Secondary Subject Heading:      | Pharmacology and therapeutics                                                                                                                                                                                                                                                                                                                                                                                                                                          |
| Keywords:                       | MENTAL HEALTH, PSYCHIATRY, Adverse events < THERAPEUTICS                                                                                                                                                                                                                                                                                                                                                                                                               |
|                                 |                                                                                                                                                                                                                                                                                                                                                                                                                                                                        |

SCHOLARONE™  
Manuscripts

1  
2  
3 TITLE PAGE  
4  
5

6 **Movement side-effects of antipsychotic drugs in adults with intellectual disability: cohort**  
7 **study**  
8  
9

10  
11 Dr Rory Sheehan\*, MSc, Division of Psychiatry, University College London

12  
13 Dr Laura Horsfall\*, PhD, Research Department of Primary Care and Population Health,  
14 University College London  
15

16  
17 Dr André Strydom, PhD, Division of Psychiatry, University College London

18  
19 Professor David Osborn, PhD, Division of Psychiatry, University College London

20  
21 Dr Kate Walters, PhD, Research Department of Primary Care and Population Health,  
22 University College London  
23

24  
25 Professor Angela Hassiotis, PhD, Division of Psychiatry, University College London  
26

27  
28 \*Rory Sheehan and Laura Horsfall contributed equally to this work.  
29  
30

31  
32 Corresponding author: Dr Rory Sheehan

33  
34 Address: Division of Psychiatry, University College London, 6<sup>th</sup> Floor Maple House, 149  
35 Tottenham Court Road, London W1T 7NF  
36

37 Telephone: 0207-679-9201

38  
39 E-mail: r.sheehan@ucl.ac.uk  
40  
41  
42  
43  
44  
45  
46  
47  
48  
49  
50  
51  
52  
53  
54  
55  
56  
57  
58  
59  
60

1  
2  
3 ABSTRACT  
4  
5

6 **Movement side-effects of antipsychotic drugs in adults with intellectual disability: cohort**  
7 **study**  
8  
9

10  
11 **Objectives** To measure the incidence of movement side-effects of antipsychotic drugs in  
12 adults with intellectual disability and compare rates with adults without intellectual  
13 disability.  
14  
15

16  
17  
18  
19 **Design** Cohort study using data from The Health Improvement Network  
20

21  
22 **Setting** Primary care  
23  
24

25  
26 **Participants** Adults with intellectual disability prescribed antipsychotic drugs matched to a  
27 control group of adults without intellectual disability prescribed antipsychotic drugs.  
28  
29

30  
31 **Outcome measures** New records of movement side-effect including, acute dystonias,  
32 akathisia, pseudo-Parkinsonism, tardive dyskinesia, and neuroleptic malignant syndrome.  
33  
34

35  
36  
37 **Results** 9,013 adults with intellectual disability and a control cohort of 34,242 adults without  
38 intellectual disability together contributed 148,709 person-years data. The overall incidence  
39 of recorded movement side-effects was 275 per 10,000 person-years (95% confidence  
40 interval 256-296) in the intellectual disability group and 248 per 10,000 person-years (95%  
41 confidence interval 237-260) in the control group. The incidence of any recorded movement  
42 side-effect was significantly greater in people with intellectual disability compared to those  
43 without (incidence rate ratio 1.30, 95% confidence interval 1.18 to 1.42,  $p < 0.001$ , after  
44 adjustment for potential confounders), with pseudo-Parkinsonism and akathisia showing  
45 the greatest difference between the groups. Neuroleptic malignant syndrome, although  
46 occurring infrequently, was three times more common in people with intellectual disability  
47 prescribed antipsychotic drugs (incidence rate ratio 3.03, 95% confidence interval 1.26 to  
48 7.30,  $p = 0.013$ ). Differences in rates of movement side-effects between the groups were not  
49  
50  
51  
52  
53  
54  
55  
56  
57  
58  
59  
60

1  
2  
3 due to differences in the proportions prescribed first- and second-generation antipsychotic  
4 drugs.  
5  
6  
7

8 **Conclusions** This study provides evidence to substantiate the long-held assumption that  
9 people with intellectual disability are more susceptible to movement side-effects of  
10 antipsychotic drugs. Assessment for movement side-effects should be integral to  
11 antipsychotic drug monitoring in people with intellectual disability. Regular medication  
12 review is essential to ensure optimal prescribing in this group.  
13  
14  
15  
16  
17  
18  
19  
20  
21  
22  
23  
24  
25  
26  
27  
28  
29  
30  
31  
32  
33  
34  
35  
36  
37  
38  
39  
40  
41  
42  
43  
44  
45  
46  
47  
48  
49  
50  
51  
52  
53  
54  
55  
56  
57  
58  
59  
60

## ARTICLE SUMMARY

### Strengths and limitations of this study

- This study includes a very large number of people with and without intellectual disability who have been prescribed antipsychotic drugs.
- The Health Improvement Network is a UK primary care database that contains accurate recording of demographic and clinical information and drug prescribing.
- This is the first study to directly compare the rates of movement side-effects of antipsychotic drugs between people with intellectual disability and those without, and offers new insights into the risk-benefit ratio of antipsychotic drug prescribing to people with intellectual disability.
- Recording of movement side-effects of antipsychotic drugs in primary care has not been validated.
- Antipsychotic drugs prescribed outside primary care and movement side-effects identified in other settings may not have been recorded by our method.

### FUNDING STATEMENT

This work was supported by The Baily Thomas Charitable Fund grant number 518669 and the National Institute for Health Research grant reference RP-DG-0611-10003. The funders had no role in study design, data collection and analysis, decision to publish, or preparation of the manuscript.

### COMPETING INTERESTS

Rory Sheehan reports no conflicts of interest.

Laura Horsfall reports no conflicts of interest.

André Strydom reports grants from Roche pharmaceuticals, outside the submitted work.

David Osborn reports no conflicts of interest.

Kate Walters reports no conflicts of interest.

Angela Hassiotis reports no conflicts of interest.

### AUTHOR CONTRIBUTIONS

Rory Sheehan developed the idea and method for the study, interpreted the results, and wrote the manuscript. Rory Sheehan is guarantor.

Laura Horsfall developed the idea and method for the study, performed the data extraction and analysis, interpreted the results, and wrote the manuscript.

André Strydom developed the idea and method for the study, interpreted the results, and wrote the manuscript.

David Osborn developed the idea and method for the study, interpreted the results, and wrote the manuscript.

Kate Walters developed the idea and method for the study, interpreted the results, and wrote the manuscript.

Angela Hassiotis developed the idea and method for the study, interpreted the results, and wrote the manuscript.

### DATA SHARING STATEMENT

Copies of Read code lists used in this study are available from the authors, on request.

1  
2  
3 MANUSCRIPT  
4  
5  
6

7 **Movement side-effects of antipsychotic drugs in adults with intellectual disability: cohort**  
8 **study**  
9

10  
11  
12 Introduction  
13

14  
15 Movement (extra-pyramidal) side-effects, including acute dystonias, akathisia,  
16 Parkinsonism, and tardive dyskinesia, are a well-recognised complication of antipsychotic  
17 drugs which are thought to occur secondary to antagonism of dopamine D2 receptors in the  
18 striatum and meso-cortex.<sup>1</sup> Movement side-effects can be distressing, disabling, and  
19 difficult to treat and their presence is associated with poor medication compliance, stigma,  
20 and reduced quality of life.<sup>2</sup>  
21  
22  
23  
24  
25  
26

27  
28 Intellectual disability (ID) is a lifelong condition characterised by global deficits in cognitive  
29 and adaptive functioning. People with ID experience relatively high rates of mental illness<sup>3</sup>  
30 and many worldwide and in the UK are prescribed antipsychotic drugs. There has been  
31 renewed focus on the appropriateness of antipsychotic drug prescribing in people with ID  
32 following recent evidence that antipsychotic drugs are often used in the absence of an  
33 underlying diagnosed mental illness,<sup>4</sup> in many cases in an attempt to manage challenging  
34 behaviour, despite a lack of evidence that they are effective in this context.<sup>5</sup> There has been  
35 relatively little formal investigation of antipsychotic drug side-effects in people with ID and  
36 most of our knowledge is extrapolated from studies conducted in people of average  
37 intelligence. People with ID are often considered to be at greater risk of antipsychotic drug-  
38 induced movement side-effects than people without ID<sup>6</sup> but no studies directly compare  
39 rates between the two groups. Furthermore, knowledge of a specific mechanism that might  
40 underpin any association between ID and movement side-effects extends only to a vague  
41 theory that organic brain dysfunction makes centrally-mediated side-effects of psychotropic  
42 drugs more likely.<sup>7</sup>  
43  
44  
45  
46  
47  
48  
49  
50  
51  
52  
53  
54  
55  
56  
57  
58  
59  
60

1  
2  
3 We undertook a cohort study using a large nationally-representative database to compare  
4 the incidence of recorded movement side-effects in adults with and without ID who are  
5 prescribed antipsychotic drugs.  
6  
7  
8

## 9 10 Methods

### 11 12 13 *Data source*

14  
15  
16  
17 Data were obtained from The Health Improvement Network (THIN), a large UK primary care  
18 database that contains the electronic health records of more than 3.7 million active patients  
19 in over 550 general practices (<http://www.epic-uk.org/our-data/our-data.shtml>). The  
20 patients included in the database are representative of the UK population in age, sex, and  
21 morbidity and mortality.<sup>8,9</sup> The THIN database contains records of symptoms, signs,  
22 diagnoses, and treatments; data is added by general practitioners (primary care physicians)  
23 using a standardised clinical dictionary of Read codes.<sup>10</sup> Recording of illness in primary care  
24 records has been shown to be accurate and all prescribed medication must be issued  
25 through the system. The primary care record therefore is a suitable means of conducting  
26 pharmaco-epidemiological research.  
27  
28  
29  
30  
31  
32  
33  
34  
35

36  
37 THIN data are pseudonymised at source and made available to researchers who have  
38 purchased a license. THIN has overall ethical approval to collate data and this study received  
39 approval from the THIN Scientific Review Committee (reference 14-071).  
40  
41  
42

### 43 44 *Study cohort*

45  
46  
47 For this study, all adults with recorded ID and a history of oral antipsychotic drug  
48 prescription were extracted using a previously-defined and tested list of diagnostic Read  
49 codes (including codes for ID and conditions associated with ID) and antipsychotic drug  
50 codes,<sup>4</sup> based on chapters of the *British National Formulary*. General practitioners are  
51 incentivised by the Quality Outcomes Framework (QOF) to keep a register of people with ID  
52 which improves recording in the database. The study period was 1<sup>st</sup> January 1999 to 31<sup>st</sup>  
53 December 2014. Entry to the cohort was set as the date of the first antipsychotic drug  
54  
55  
56  
57  
58  
59  
60



1  
2  
3 prescription issued after the latest of; registration with the GP practice contributing data;  
4 the patient's 18<sup>th</sup> birthday; the start of the study period; the date the practice achieved  
5 compliance with standard measures of data quality.<sup>11,12</sup> People contributed person-years  
6 (PYs) of data from entry to cohort exit. Exit from the cohort was defined as the first of; the  
7 final antipsychotic drug prescription plus the length of the prescription; de-registration with  
8 the GP practice contributing data; the end of the study period; or death. People also exited  
9 at the date they developed a movement side-effect as they were no longer considered at  
10 risk after this time.

11  
12  
13  
14  
15  
16  
17  
18  
19 A comparison cohort of people prescribed antipsychotic drugs but without ID was extracted  
20 using stratified sampling within each GP practice with frequency matching to ensure similar  
21 population-level characteristics across the two cohorts in terms of age, gender, and year of  
22 antipsychotic prescription. Up to six people without ID were selected for every person with  
23 ID and the same criteria were used to define cohort entry and exit.

24  
25  
26  
27  
28  
29  
30 A Read code list for movement side-effects was developed using previously-described  
31 methodology and applied to the cohort to determine incidence of movement side-effects<sup>13</sup>  
32 (list available from the authors, on request). Movement side-effects were categorised as;  
33 acute dystonias; akathisia; pseudo-Parkinsonism; or tardive dyskinesia; in accordance with  
34 orthodox classification. A separate category was established for neuroleptic malignant  
35 syndrome (NMS), being a very specific adverse effect, and a further category included for  
36 broad codes which could not be sub-categorised. Prescriptions for selected antimuscarinic  
37 drugs (procyclidine, orphenadrine, trihexyphenidyl) were used as proxy indicators of  
38 movement side-effects in those prescribed antipsychotic drugs. People were defined as  
39 having a history of movement disorder if a relevant Read code was applied (or  
40 antimuscarinic drug prescribed) prior to cohort entry or within six months of registration  
41 with the practice, as this has been shown to improve the validity of incidence calculations.<sup>14</sup>

#### 42 43 44 45 46 47 48 49 50 51 52 53 *Covariates*

54  
55  
56 Sociodemographic covariates included age, sex, calendar year, and the Townsend  
57 Deprivation Score (a composite score in fifths based on postcode and Census recording of  
58  
59  
60

1  
2  
3 local unemployment, car ownership, home ownership, and overcrowding).<sup>15</sup> Other  
4 covariates included history of antipsychotic use at cohort entry, antipsychotic average daily  
5 dose, and days on treatment between the start and end of follow-up. Average daily dose  
6 was measured as Chlorpromazine equivalents (CPZE) to account for polypharmacy and  
7 those who switched drugs during follow-up. Where we were unable to extract daily dose  
8 data (for example, in the minority of cases where the duration of a prescription was not  
9 recorded) the prescribed dose for the previous or subsequent prescription for the same  
10 drug and formulation was used. It was not possible to estimate the daily dose for 5% of  
11 prescriptions and these were excluded from the study. Prescriptions for drug doses above  
12 three times the upper licensed limit were excluded as probable coding errors (<1%).  
13  
14  
15  
16  
17  
18  
19  
20  
21

### 22 *Statistical analysis*

23  
24  
25  
26 Multivariable mixed Poisson regression was used to calculate incident rates of movement  
27 disorders during exposure to antipsychotic drugs in people with and without ID by calendar  
28 year, adjusted for any temporal changes in age and sex. General practice was included as a  
29 random effect to account for any data clustering. Calendar year was initially modelled as a  
30 continuous variable and we then used the likelihood ratio test to compare this with a model  
31 in which year was entered as a categorical variable to examine the possibility of non-linear  
32 time trends.  
33  
34  
35  
36  
37  
38  
39

40 Multivariable mixed Poisson regression was also used to compare the rates of movement  
41 disorder during exposure to antipsychotic drugs in people with and without ID, adjusted for  
42 covariates. We conducted a sensitivity analysis where we restricted the analysis to time  
43 periods when people were exclusively prescribed first- or second-generation antipsychotic  
44 drugs, and further when we restricted the analysis to times when only risperidone was  
45 prescribed. All analyses were repeated after excluding people with a diagnosis of idiopathic  
46 Parkinson's disease.  
47  
48  
49  
50  
51  
52

53  
54 We considered a p-value of 0.05 to be statistically significant (two-tailed) and used Stata  
55 version 13 for all analyses (StataCorp, TX).  
56  
57  
58  
59  
60

## Results

In total 9,039 people with ID met inclusion criteria and were matched to 34,242 people without ID, and together contributed 148,709 person-years (PYs) data. The two cohorts were similar in terms of age, sex, level of social deprivation, and history of movement disorder at cohort entry (table 1). The prevalence of movement disorder at baseline was slightly higher for people with ID and a history of antipsychotic use (31%) compared to those without ID and a history of antipsychotic drug use (24%) but the proportions of those with a history of movement disorder without antipsychotic drug use were equal (6%) at cohort entry. Average daily dose of antipsychotic was similar between the two groups but those with ID had longer time periods between their first and last antipsychotic prescription and more days on treatment between those dates. Table 2 shows the distribution of antipsychotic drugs prescribed to the study cohort. Risperidone was the most common drug prescribed in the ID cohort (28.5% prescriptions to people with ID, 14.7% prescriptions in the non-ID cohort); other drugs were prescribed in roughly equal proportions between the two groups.

[Table 1 near here]

[Table 2 near here]

The overall incidence of recorded movement side-effects was 275 per 10,000PYs (95% confidence interval (CI) 256-296) in the ID group and 248 per 10,000PYs (95%CI 237-260) in the non-ID group (table 3). Pseudo-Parkinsonism was the most commonly recorded movement side-effect in both groups. After adjustment, the incidence rate of any movement disorder was 30% higher in people with ID compared to those without ID (IRR 1.30, 95%CI 1.18 to 1.42,  $p < 0.001$ ). Similar differences in movement side-effect recording were noted when defined by diagnostic Read codes or by proxy, using prescription for antimuscarinic drugs. The incidence rates of akathisia, pseudo-Parkinsonism, and neuroleptic malignant syndrome were significantly higher in those with ID compared with those without ID.

1  
2  
3 Analysis restricted to periods when people were exclusively prescribed first- or second-  
4 generation antipsychotic drugs did not change the results; movement side-effects were still  
5 significantly more likely to be recorded in people with ID compared to those without (table  
6 4). Excluding people with Parkinson's disease from the analysis (n=451) had no meaningful  
7 effect on any of the results.  
8  
9  
10

11  
12  
13 [Table 3 near here]  
14

15  
16  
17 [Table 4 near here]  
18  
19

20  
21 Time trend analysis showed that the incidence of recording of movement side-effects in  
22 those prescribed antipsychotic drugs fell significantly over the course of the study period in  
23 both groups (figure 1); each calendar year was associated with a 5% decline in the recording  
24 of movement side-effects in people with ID (95%CI 2-8%,  $p<0.0001$ ) and a 7% decline in  
25 people without ID (95%CI 5-9%,  $p<0.001$ ), after accounting for changes in cohort age and  
26 sex. Prescriptions for antimuscarinic drugs declined by 3% per year in people with ID (95%CI  
27 1-5%,  $p=0.002$ ) and 5% per year in people without ID (95%CI 4-7%,  $p<0.001$ ). Average daily  
28 antipsychotic dose, measured in Chlorpromazine equivalents, remained broadly constant  
29 during the study period (data not shown).  
30  
31  
32  
33  
34  
35  
36  
37

38 [Figure 1 near here]  
39  
40  
41

## 42 Discussion

43  
44

45 People with ID have long been considered at greater risk of adverse side-effects of  
46 antipsychotic drugs. However to date very little evidence has been presented to  
47 substantiate this belief. Our data suggest that people with ID are more likely to experience  
48 movement side-effects of antipsychotic drugs; this finding is robust and persists when  
49 movement side-effects are defined by diagnostic Read code alone and when they are  
50 measured using prescription of anti-muscarinic drugs as proxy.  
51  
52  
53  
54  
55  
56  
57  
58  
59  
60

1  
2  
3 Most people in our cohort received a second-generation antipsychotic drug. The types of  
4 drugs that were prescribed in our study were broadly similar between the group with ID and  
5 the group without, and were consistent with other recent data examining antipsychotic  
6 prescribing in community-dwelling adults living in the UK.<sup>16</sup> The exception was risperidone,  
7 which was prescribed more frequently to people with ID; this accords with other studies<sup>17</sup>  
8 and is likely to reflect an attempt by clinicians to prescribe the antipsychotic with greatest  
9 (albeit still limited) evidence of benefit for challenging behaviour in people with ID.<sup>5,18</sup> The  
10 difference in incidence of movement side-effects between people with and without ID  
11 remained when first- and second-generation agents were considered separately, and when  
12 risperidone was considered alone, suggesting that headline differences between the groups  
13 were not due to different prescribing practices.  
14  
15  
16  
17  
18  
19  
20  
21  
22  
23

24 Although their improved movement side-effect profile has been considered a major  
25 advantage of second-generation antipsychotic drugs, more recent evaluation of the  
26 evidence suggests that the initial enthusiasm for second-generation agents was misplaced  
27 and largely based on studies that made unequal comparisons between second-generation  
28 and high-potency first-generation drugs.<sup>19,20</sup> In this study we did not set out to compare  
29 movement side-effects between first and second-generation agents but we observed that  
30 the prescription of second-generation agents was associated with a slightly lower incidence  
31 of recorded movement side-effects in people with and without ID; clearly further work is  
32 needed to provide definitive data on this contentious aspect of antipsychotic drug side-  
33 effects.  
34  
35  
36  
37  
38  
39  
40  
41  
42  
43

44 There is a lack of work with which we can directly compare our results; previous studies that  
45 investigate movement disorders in people with ID who take anti-psychotic drugs have used  
46 differing methods to define and ascertain movement disorder, selected particular  
47 populations (often convenience sampling those residing in institutions), and tend to report  
48 point prevalence figures. None have directly compared rates of movement side-effect in  
49 people with ID to controls without ID. Nevertheless, it is clear that antipsychotic drug-  
50 induced movement side-effects are reasonably common in people with ID. In once recent  
51 study of hospitalised patients with borderline-mild ID and challenging behaviour, almost half  
52 were found to have a movement disorder, and the presence of movement disorder was  
53  
54  
55  
56  
57  
58  
59  
60

1  
2  
3 more likely in those prescribed antipsychotic medication.<sup>21</sup> The most common type was  
4 Parkinsonism, as in our study. De Kuyper and colleagues in the Netherlands report that just  
5 over half of their sample with ID who had been taking antipsychotic drugs for more than a  
6 year had evidence of movement side-effects.<sup>22</sup>  
7  
8  
9

10  
11 It is interesting that in our study the rates of recording of tardive dyskinesia were relatively  
12 low and it was not more frequently recorded in people with ID. Previous work has shown  
13 tardive dyskinesia to be common; one study of institutionalised adults with ID taking long-  
14 term antipsychotic drugs found a prevalence rate of tardive dyskinesia of 45%.<sup>23</sup>  
15 Spontaneous dyskinesias are also common in people with ID<sup>24</sup> and it is possible that drug-  
16 induced tardive dyskinesia may be misinterpreted as part of the underlying ID and under-  
17 recorded, an example of 'diagnostic overshadowing'. Several assessment scales are available  
18 for measuring movement side-effects of antipsychotic drugs and may be utilised in  
19 monitoring, although there are obvious challenges in assessment of subjective symptoms  
20 (such as akathisia) people with ID who may have limited understanding and verbal  
21 communication ability.<sup>25,26,27</sup>  
22  
23  
24  
25  
26  
27  
28  
29  
30  
31

32  
33 Neuroleptic malignant syndrome is a rare idiosyncratic complication of antipsychotic  
34 therapy consisting of fever, muscle rigidity, autonomic dysfunction, and alterations in  
35 cognitive state. We found a significantly increased incidence of neuroleptic malignant  
36 syndrome amongst people with ID, although the low number of recorded events in the  
37 database means our results need to be interpreted with caution. An association between  
38 neuroleptic malignant syndrome and ID has been demonstrated previously<sup>28,29</sup> and this,  
39 combined with the seriousness of the condition (particularly in people with ID<sup>29,30</sup>), warrants  
40 further attention.  
41  
42  
43  
44  
45  
46  
47  
48

49 We observed a decline in the recording of movement side-effects in both groups over the  
50 past 15 years. It might be that; clinicians have focused their attention on measuring and  
51 managing metabolic complications; the wide scale switch from first- to second-generation  
52 antipsychotic drugs<sup>31</sup> has partially contributed to an actual decrease in the rate of  
53 movement side-effect; the clinical expectation of reduced movement side-effects with  
54 newer drugs has reduced vigilance and recognition of these side-effects.  
55  
56  
57  
58  
59  
60

### *Strengths and limitations*

This is the first study to directly compare the rate of antipsychotic drug-induced movement side-effects between people with and without ID. Our findings are strengthened by the large numbers of people included and the representativeness of the sample drawn from a representative community population. UK general practices are incentivised to maintain an accurate list of people with ID. Prescriptions are also accurately recorded in THIN although by excluding depot preparations (and the small number of prescriptions that may have been issued in secondary care) we might have underestimated exposure to antipsychotic drugs.

A limitation of our work that is common across observational studies that utilise routinely-collected health data is the lack of direct validation of diagnoses. The Read code list for movement side-effects was devised using a comprehensive methodology and with input from practising primary and specialist secondary care physicians but not tested against 'gold standard' methods for identifying movement side-effects. We assume that relevant Read codes added to patient records during exposure to antipsychotic drugs represent adverse side-effects; this may not always be the case and symptoms of movement disorder may arise independently or in response to other prescribed medications (such as antidepressants and anti-epileptic drugs) that we did not measure. Our method measures only recorded side-effects, that is, people must consult their General Practitioner for the side-effect to be noted formally. Even when seen by a clinician, there is evidence that movement side-effects might be missed.<sup>32</sup> It is possible, therefore, that our results under-estimate the true rate of movement side-effect of antipsychotic drugs. How this might bias the comparison between ID and non-ID groups is not clear. People with ID have lower health literacy, lack knowledge of psychotropic drug side-effects,<sup>33</sup> and may encounter barriers to accessing primary care,<sup>34</sup> and hence be less likely to present to primary care when experiencing treatment side-effects. Conversely, people with ID may be monitored more closely by carers or by pro-active General Practitioners who recognise the higher health need in this group, for example, by offering an annual health check. Some cases of movement side-effects may have been missed if people who are in contact with specialist services contact their psychiatrist directly, rather than visiting their General Practitioner.

1  
2  
3 Neuroleptic malignant syndrome may be underestimated either because milder forms are  
4 missed, or because it is more likely to be treated in the acute hospital.  
5  
6

7  
8 Further work will be needed to elucidate the potential pathophysiological mechanism  
9 underlying the observed association between ID and movement side-effects of  
10 antipsychotic drugs.  
11  
12

### 13 Conclusions

14  
15  
16  
17  
18  
19 Movement side-effects are only one aspect of a number of antipsychotic drug adverse  
20 effects. They can impact medication compliance, quality of life, and compound the stigma of  
21 mental illness and/or intellectual disability.<sup>35,36</sup> They can be difficult to recognise, to treat  
22 and, in the case of the tardive syndromes, can persist or even worsen on withdrawal of the  
23 offending drug. People with ID appear more susceptible to movement side-effects of  
24 antipsychotic drugs than people without ID and this should be considered when treatment  
25 decisions are made, especially given the relatively high rates of other comorbidities in this  
26 population. Our data support a modest potential benefit of second generation antipsychotic  
27 drugs in reducing the incidence of movement side-effects, but more work is needed to  
28 confirm this finding, and it must be balanced against the increased propensity of second-  
29 generation agents to cause metabolic side-effects.  
30  
31  
32  
33  
34  
35  
36  
37  
38

39  
40 There has been much recent public and professional interest in the prescription of  
41 antipsychotic drugs to people with intellectual disability and UK national policy supports  
42 attempts to reduce the prescribing of antipsychotic drugs for challenging behaviour  
43 ([https://www.england.nhs.uk/wp-content/uploads/2016/06/stopping-over-](https://www.england.nhs.uk/wp-content/uploads/2016/06/stopping-over-medication.pdf)  
44 [medication.pdf](https://www.england.nhs.uk/wp-content/uploads/2016/06/stopping-over-medication.pdf)). We recently showed that reduction or discontinuation of antipsychotic  
45 drugs in people with ID and challenging behaviour (but without severe mental illness) risks  
46 harm as well as providing potential benefits and advocate individual treatment decisions in  
47 this group.<sup>37</sup> The current work informs the risk-benefit analysis undertaken as part of  
48 antipsychotic drug prescribing in people with ID and reinforces the need for regular and  
49 effective medication review, which must include assessment of possible movement side-  
50 effects.  
51  
52  
53  
54  
55  
56  
57  
58  
59  
60



1  
2  
3  
4  
5  
6  
7  
8  
9  
10  
11  
12  
13  
14  
15  
16  
17  
18  
19  
20  
21  
22  
23  
24  
25  
26  
27  
28  
29  
30  
31  
32  
33  
34  
35  
36  
37  
38  
39  
40  
41  
42  
43  
44  
45  
46  
47  
48  
49  
50  
51  
52  
53  
54  
55  
56  
57  
58  
59  
60

For peer review only

## References

1. Marsden C, Jenner P. The pathophysiology of extrapyramidal side-effects of neuroleptic drugs. *Psychological medicine* 1980; **10**: 55-72.
2. Leucht S, Wahlbeck K, Hamann J, Kissling W. New generation antipsychotics versus low-potency conventional antipsychotics: a systematic review and meta-analysis. *The Lancet* 2003; **361**: 1581-9.
3. Cooper S-A, Smiley E, Morrison J, Williamson A, Allan L. Mental ill-health in adults with intellectual disabilities: prevalence and associated factors. *The British Journal of Psychiatry* 2007; **190**: 27-35.
4. Sheehan R, Hassiotis A, Walters K, Osborn D, Strydom A, Horsfall L. Mental illness, challenging behaviour, and psychotropic drug prescribing in people with intellectual disability: UK population based cohort study. *BMJ* 2015; **351**: h4326.
5. Deb S, Sohanpal S, Soni R, Lentre L, Unwin G. The effectiveness of antipsychotic medication in the management of behaviour problems in adults with intellectual disabilities. *Journal of Intellectual Disability Research* 2007; **51**: 766-77.
6. Arnold LE. Clinical pharmacological issues in treating psychiatric disorders of patients with mental retardation. *Annals of clinical psychiatry* 1993; **5**: 189-97.
7. Cunningham-Owens DG. Special populations. A guide to extrapyramidal side-effects of antipsychotic drugs. 2nd ed. Cambridge, UK: Cambridge University Press; 2014.
8. Blak B, Thompson M, Dattani H, Bourke A. Generalisability of The Health Improvement Network (THIN) database: demographics, chronic disease prevalence and mortality rates. *Journal of Innovation in Health Informatics* 2011; **19**: 251-5.
9. Bourke A, Dattani H, Robinson M. Feasibility study and methodology to create a quality-evaluated database of primary care data. *Journal of Innovation in Health Informatics* 2004; **12**: 171-7.
10. Booth N. What are the Read codes? *Health libraries review* 1994; **11**: 177-82.
11. Maguire A, Blak BT, Thompson M. The importance of defining periods of complete mortality reporting for research using automated data from primary care. *Pharmacoepidemiology and drug safety* 2009; **18**: 76-83.
12. Horsfall L, Walters K, Petersen I. Identifying periods of acceptable computer usage in primary care research databases. *Pharmacoepidemiology and drug safety* 2013; **22**: 64-9.
13. Davé S, Petersen I. Creating medical and drug code lists to identify cases in primary care databases. *Pharmacoepidemiology and drug safety* 2009; **18**: 704-7.

14. Lewis JD, Bilker WB, Weinstein RB, Strom BL. The relationship between time since registration and measured incidence rates in the General Practice Research Database. *Pharmacoepidemiology and drug safety* 2005; **14**: 443-51.
15. Townsend P, Phillimore P, Beattie A. Health and deprivation: inequality and the North. Routledge; 1988.
16. Marston L, Nazareth I, Petersen I, Walters K, Osborn DP. Prescribing of antipsychotics in UK primary care: a cohort study. *BMJ Open* 2014; **4**: e006135.
17. Frighi V, Stephenson MT, Morovat A, et al. Safety of antipsychotics in people with intellectual disability. *The British Journal of Psychiatry* 2011; **199**: 289-95.
18. Gagiano C, Read S, Thorpe L, Eerdeken M, Van Hove I. Short-and long-term efficacy and safety of risperidone in adults with disruptive behavior disorders. *Psychopharmacology* 2005; **179**: 629-36.
19. Leucht S, Cipriani A, Spineli L, et al. Comparative efficacy and tolerability of 15 antipsychotic drugs in schizophrenia: a multiple-treatments meta-analysis. *The Lancet* 2013; **382**: 951-62.
20. Peluso MJ, Lewis SW, Barnes TR, Jones PB. Extrapyramidal motor side-effects of first-and second-generation antipsychotic drugs. *The British Journal of Psychiatry* 2012; **200**: 387-92.
21. Scheifes A, Walraven S, Stolker JJ, et al. Movement Disorders in Adults With Intellectual Disability and Behavioral Problems Associated With Use of Antipsychotics. *Journal of clinical psychopharmacology* 2016; **36**: 308-13.
22. de Kuijper G, Mulder H, Evenhuis H, Scholte F, Visser F, Hoekstra PJ. Determinants of physical health parameters in individuals with intellectual disability who use long-term antipsychotics. *Research in developmental disabilities* 2013; **34**: 2799-809.
23. Matson JL, Fodstad JC, Neal D, Dempsey T, Rivet TT. Risk factors for tardive dyskinesia in adults with intellectual disability, comorbid psychopathology, and long-term psychotropic use. *Research in developmental disabilities* 2010; **31**: 108-16.
24. Rogers D, Karki C, Bartlett C, Pocock P. The motor disorders of mental handicap. An overlap with the motor disorders of severe psychiatric illness. *The British Journal of Psychiatry* 1991; **158**: 97-102.
25. Guy W. Abnormal involuntary movement scale. ECDEU Assessment Manual for Psychopharmacology. Washington, DC: US Department of Health, Education and Welfare; 1976.
26. Barnes TR. A rating scale for drug-induced akathisia. *The British Journal of Psychiatry* 1989; **154**: 672-6.
27. Simpson G, Angus J. A rating scale for extrapyramidal side effects. *Acta Psychiatrica Scandinavica* 1970; **45**: 11-9.

- 1  
2  
3 28. Viejo L, Morales V, Punal P, Perez J, Sancho R. Risk factors in neuroleptic malignant  
4 syndrome. A case–control study. *Acta Psychiatrica Scandinavica* 2003; **107**: 45-9.  
5  
6 29. Shalev A, Munitz H. The neuroleptic malignant syndrome: agent and host interaction. *Acta*  
7 *Psychiatrica Scandinavica* 1986; **73**: 337-47.  
8  
9 30. Boyd RD. Neuroleptic malignant syndrome and mental retardation: review and analysis of 29  
10 cases. *American journal on mental retardation* 1993; **98**: 143-55.  
11  
12 31. Verdoux H, Tournier M, Begaud B. Antipsychotic prescribing trends: a review of pharmaco-  
13 epidemiological studies. *Acta Psychiatrica Scandinavica* 2010; **121**: 4-10.  
14  
15 32. Haddad PM, Dursun SM. Neurological complications of psychiatric drugs: clinical features  
16 and management. *Human Psychopharmacology: Clinical and Experimental* 2008; **23**: S15-S26.  
17  
18 33. Crossley R, Withers P. Antipsychotic medication and people with intellectual disabilities:  
19 their knowledge and experiences. *Journal of Applied Research in Intellectual Disabilities* 2009; **22**: 77-  
20 86.  
21  
22 34. Lennox N, Diggins J, Ugoni A. The general practice care of people with intellectual disability:  
23 barriers and solutions. *Journal of Intellectual Disability Research* 1997; **41**: 380-90.  
24  
25 35. Schouten HJ, Knol W, Egberts TC, Schobben AF, Jansen PA, van Marum RJ. Quality of life of  
26 elderly patients with antipsychotic-induced parkinsonism: A cross-sectional study. *Journal of the*  
27 *American Medical Directors Association* 2012; **13**: 82. e1-. e5.  
28  
29 36. Scheifes A, Walraven S, Stolker JJ, Nijman HL, Egberts TC, Heerdink ER. Adverse events and  
30 the relation with quality of life in adults with intellectual disability and challenging behaviour using  
31 psychotropic drugs. *Research in developmental disabilities* 2016; **49**: 13-21.  
32  
33 37. Sheehan R, Hassiotis A. Reduction or discontinuation of antipsychotics for challenging  
34 behaviour in adults with intellectual disability: a systematic review. *The Lancet Psychiatry* 2016; **4**:  
35 238-56.  
36  
37  
38  
39  
40  
41  
42  
43  
44  
45  
46  
47  
48  
49  
50  
51  
52  
53  
54  
55  
56  
57  
58  
59  
60

TABLE 1 – Cohort characteristics

|                                                                                      | ID cohort         | Non-ID cohort      |
|--------------------------------------------------------------------------------------|-------------------|--------------------|
| Total number (%)                                                                     | 9,039 (21)        | 34,242 (79)        |
| Male, <i>n</i> (%)                                                                   | 5,279 (58)        | 18,825 (55)        |
| Average age, <i>yrs</i> (SD)                                                         | 42 (16)           | 44 (16)            |
| Townsend score, <i>n</i> (%)                                                         |                   |                    |
| 1                                                                                    | 1,403 (16)        | 4,860 (14)         |
| 2                                                                                    | 1,752 (19)        | 5,119 (15)         |
| 3                                                                                    | 1,948 (22)        | 6,481 (19)         |
| 4                                                                                    | 1,942 (22)        | 8,189 (24)         |
| 5                                                                                    | 1,563 (17)        | 7,911 (23)         |
| Missing                                                                              | 417 (5)           | 1,619 (5)          |
| History of antipsychotic use at cohort entry, <i>n</i> (%)                           | 6,684 (74)        | 16,227 (47)        |
| History of movement disorder at cohort entry, <i>n</i> (%)                           | 2,192 (24)        | 4,946 (14)         |
| History of movement disorder without antipsychotic use at cohort entry, <i>n</i> (%) | 136/2,355 (6)     | 1,038/18,015 (6)   |
| History of movement disorder and antipsychotic use at cohort entry, <i>n</i> (%)     | 2,056/6,684 (31)  | 3,908/16,227 (24)  |
| Total person-years between first and last antipsychotic prescription                 | 44,696            | 104,014            |
| Median years between first and last prescription (IQR)                               | 3.5 (1.2 to 7.9)  | 1.3 (0.19 to 4.4)  |
| Median years on treatment between first and last prescription (IQR)                  | 2.6 (0.76 to 6.3) | 0.67 (0.15 to 2.5) |
| Average daily dose, <i>CLZE</i> (SD)                                                 | 135 (156)         | 139 (146)          |

CLZE, Chlorpromazine equivalents

**TABLE 2** – frequency of antipsychotic drugs prescribed in the intellectually disabled and non-intellectually disabled cohorts

| Antipsychotic drug | ID cohort |            |                        |                                | Non-ID cohort |            |                        |                                |
|--------------------|-----------|------------|------------------------|--------------------------------|---------------|------------|------------------------|--------------------------------|
|                    | Number    | Percentage | Average daily dose, mg | Median treatment duration, yrs | Number        | Percentage | Average daily dose, mg | Median treatment duration, yrs |
| Risperidone        | 4,013     | 28.5       | 1.9                    | 1.81                           | 7,426         | 14.7       | 2.2                    | 0.47                           |
| Olanzapine         | 2,086     | 14.8       | 8.2                    | 1.62                           | 10,246        | 20.3       | 8.5                    | 0.67                           |
| Chlorpromazine     | 1,770     | 12.6       | 78.5                   | 1.12                           | 5,274         | 10.5       | 64.8                   | 0.20                           |
| Quetiapine         | 1,295     | 9.2        | 154.1                  | 0.93                           | 7,693         | 15.2       | 152.6                  | 0.72                           |
| Haloperidol        | 1,231     | 8.7        | 4.9                    | 0.68                           | 3,755         | 7.5        | 3.2                    | 0.14                           |
| Thioridazine       | 838       | 6.0        | 77.9                   | 0.82                           | 2,672         | 5.3        | 49.8                   | 0.20                           |
| Aripiprazole       | 661       | 4.7        | 10.5                   | 0.74                           | 2,638         | 5.2        | 11.8                   | 0.54                           |
| Trifluoperazine    | 456       | 3.2        | 6.5                    | 1.06                           | 3,403         | 6.8        | 4.5                    | 0.19                           |
| Zuclopenthixol     | 429       | 3.1        | 18.7                   | 2.17                           | 340           | 0.7        | 20.0                   | 0.45                           |
| Amisulpride        | 327       | 2.3        | 295.0                  | 0.94                           | 1,687         | 3.4        | 290.3                  | 0.73                           |
| Promazine          | 276       | 2.0        | 58.4                   | 0.33                           | 1,688         | 3.4        | 58.6                   | 0.16                           |
| Sulpiride          | 276       | 2.0        | 437.8                  | 1.97                           | 1,199         | 2.4        | 435.6                  | 0.79                           |
| Other*             | 980       | 7.0        | -                      | -                              | 5,230         | 10.4       | -                      | -                              |

\*Other antipsychotic drugs prescribed to <1% of ID cohort each

**TABLE 3** – Incidence rates and adjusted incident rate ratios for movement side-effects in people with and without intellectual disability prescribed antipsychotic drugs

| Variable                                                                           | ID cohort                     |                              |                                           | Non-ID cohort                 |                              |                                           | Comparison                    |                  |
|------------------------------------------------------------------------------------|-------------------------------|------------------------------|-------------------------------------------|-------------------------------|------------------------------|-------------------------------------------|-------------------------------|------------------|
|                                                                                    | No of events during follow-up | No of Person-Years (X10,000) | Incidence per 10,000 Person-Years (95%CI) | No of events during follow-up | No of Person-Years (X10,000) | Incidence per 10,000 Person-Years (95%CI) | Incidence Rate Ratio* (95%CI) | p-value          |
| <b>Any movement disorder (defined by Read code or antimuscarinic prescription)</b> | <b>743</b>                    | <b>2.7</b>                   | <b>275 (256 to 296)</b>                   | <b>1750</b>                   | <b>7.0</b>                   | <b>248 (237 to 260)</b>                   | <b>1.30 (1.18 to 1.42)</b>    | <b>&lt;0.001</b> |
| <b>Any movement disorder (defined by Read code)</b>                                | <b>446</b>                    | <b>4.4</b>                   | <b>111 (101 to 122)</b>                   | <b>952</b>                    | <b>9.4</b>                   | <b>101 (95 to 108)</b>                    | <b>1.30 (1.16 to 1.47)</b>    | <b>&lt;0.001</b> |
| <b>Any movement disorder (defined by antimuscarinic prescription)</b>              | <b>564</b>                    | <b>2.9</b>                   | <b>196 (180 to 212)</b>                   | <b>1299</b>                   | <b>7.6</b>                   | <b>172 (163 to 181)</b>                   | <b>1.29 (1.16 to 1.44)</b>    | <b>&lt;0.001</b> |
| Acute dystonia                                                                     | 60                            | 4.4                          | 14 (11 to 18)                             | 161                           | 10.2                         | 16 (14 to 19)                             | 1.00 (0.73 to 1.37)           | 0.99             |
| <b>Akathisia</b>                                                                   | <b>80</b>                     | <b>4.5</b>                   | <b>18 (15 to 23)</b>                      | <b>112</b>                    | <b>10.3</b>                  | <b>11 (9 to 13)</b>                       | <b>2.29 (1.69 to 3.12)</b>    | <b>&lt;0.001</b> |
| <b>Pseudo-Parkinsonism</b>                                                         | <b>270</b>                    | <b>4.4</b>                   | <b>64 (57 to 72)</b>                      | <b>592</b>                    | <b>9.9</b>                   | <b>60 (55 to 65)</b>                      | <b>1.20 (1.03 to 1.39)</b>    | <b>0.02</b>      |
| Tardive dyskinesia                                                                 | 61                            | 4.0                          | 14 (11 to 18)                             | 123                           | 10.3                         | 12 (10 to 14)                             | 1.27 (0.91 to 1.75)           | 0.16             |
| <b>Neuroleptic malignant syndrome</b>                                              | <b>11</b>                     | <b>4.4</b>                   | <b>3 (1 to 5)</b>                         | <b>12</b>                     | <b>10.4</b>                  | <b>1 (1-2)</b>                            | <b>3.03 (1.26 to 7.30)</b>    | <b>0.013</b>     |
| Other movement disorder                                                            | 43                            | 4.2                          | 10 (7 to 13)                              | 94                            | 10.3                         | 9 (7-11)                                  | 1.26 (0.86 to 1.85)           | 0.23             |

\*Adjusted for sex, social deprivation score, time period, history of antipsychotic drug use, average daily dose, days on treatment

**TABLE 4** – Sensitivity analysis with incidence rates and adjusted incident rate ratios for movement side-effects in people with and without intellectual disability prescribed first- and second-generation antipsychotic drugs

| Antipsychotic class        | ID cohort                     |                              |                                           | Non-ID cohort                 |                              |                                           | Comparison                    |                  |
|----------------------------|-------------------------------|------------------------------|-------------------------------------------|-------------------------------|------------------------------|-------------------------------------------|-------------------------------|------------------|
|                            | No of events during follow-up | No of Person-Years (X10,000) | Incidence per 10,000 Person-Years (95%CI) | No of events during follow-up | No of Person-Years (X10,000) | Incidence per 10,000 Person-Years (95%CI) | Incidence Rate Ratio* (95%CI) | p-value          |
| <b>First generation**</b>  | <b>247</b>                    | <b>0.8</b>                   | <b>320 (283 to 362)</b>                   | <b>569</b>                    | <b>1.9</b>                   | <b>293 (270 to 318)</b>                   | <b>1.36 (1.16 to 1.60)</b>    | <b>&lt;0.001</b> |
| <b>Second generation**</b> | <b>378</b>                    | <b>1.6</b>                   | <b>241 (218 to 267)</b>                   | <b>948</b>                    | <b>4.3</b>                   | <b>219 (206 to 233)</b>                   | <b>1.43 (1.26 to 1.62)</b>    | <b>&lt;0.001</b> |
| <b>Risperidone**</b>       | <b>124</b>                    | <b>0.6</b>                   | <b>196 (164 to 233)</b>                   | <b>96</b>                     | <b>0.5</b>                   | <b>182 (149 to 223)</b>                   | <b>1.55 (1.15 to 2.08)</b>    | <b>0.004</b>     |

\*Adjusted for sex, social deprivation score, time period, history of antipsychotic drug use, average daily dose, days on treatment

\*\* Restricted to periods when people were exclusively prescribed first- or second-generation antipsychotic drugs or risperidone



**FIGURE 1** – Time trends in crude incidence rates of a) movement side-effect defined by Read code and b) antimuscarinic drug prescription in people with and without intellectual disability prescribed antipsychotic drugs

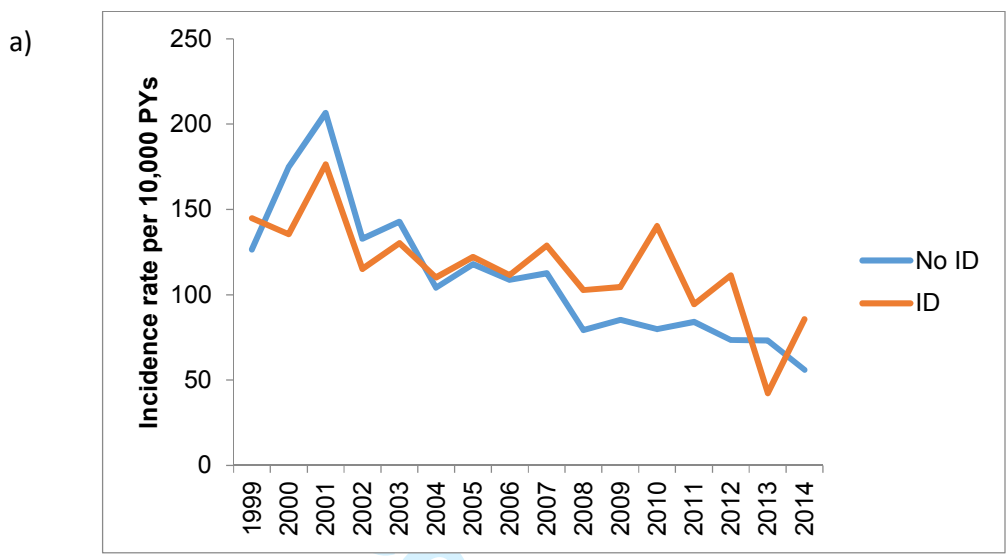

|                     |      | p-value | 95% CI       |
|---------------------|------|---------|--------------|
| <b>Non-ID group</b> | 0.93 | <0.0001 | 0.91 to 0.95 |
| <b>ID</b>           | 0.95 | 0.00064 | 0.92 to 0.98 |

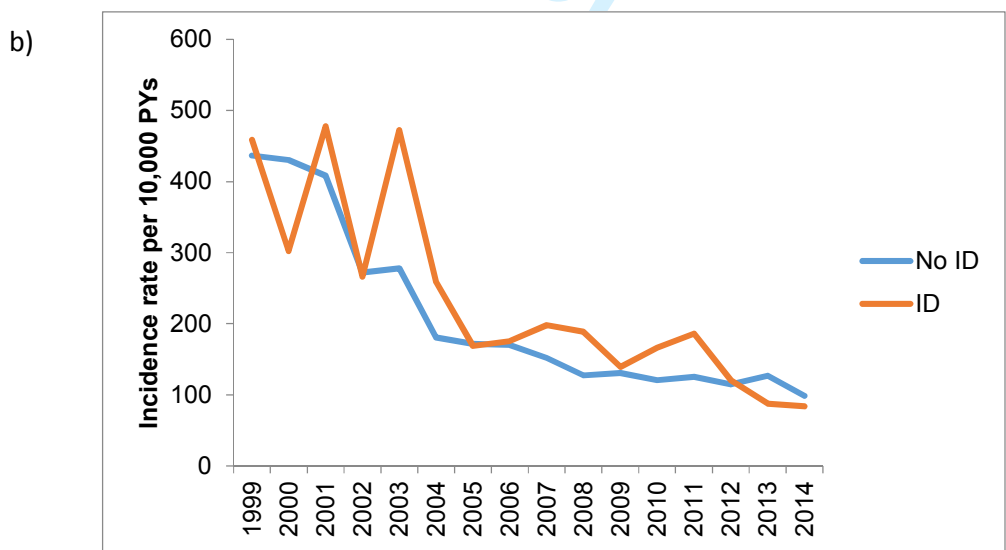

|                     |      | p-value | 95% CI       |
|---------------------|------|---------|--------------|
| <b>Non-ID group</b> | 0.95 | <0.0001 | 0.93 to 0.96 |
| <b>ID group</b>     | 0.97 | 0.002   | 0.95 to 0.99 |

Per year time trends adjusted for sex, social deprivation, history of antipsychotic use, average daily dose in Chlorpromazine equivalents, days on treatment

STROBE Statement—checklist of items that should be included in reports of observational studies

**Movement side-effects of antipsychotic drugs in adults with intellectual disability**

|                           | Item No. | Recommendation                                                                                                                                                                                                                                                                                                                                                                                                                                            | Page No. | Relevant text from manuscript                                                                                                                                                |
|---------------------------|----------|-----------------------------------------------------------------------------------------------------------------------------------------------------------------------------------------------------------------------------------------------------------------------------------------------------------------------------------------------------------------------------------------------------------------------------------------------------------|----------|------------------------------------------------------------------------------------------------------------------------------------------------------------------------------|
| <b>Title and abstract</b> | 1        | (a) Indicate the study’s design with a commonly used term in the title or the abstract                                                                                                                                                                                                                                                                                                                                                                    | 1        | Cohort study in title                                                                                                                                                        |
|                           |          | (b) Provide in the abstract an informative and balanced summary of what was done and what was found                                                                                                                                                                                                                                                                                                                                                       | 2        |                                                                                                                                                                              |
| <b>Introduction</b>       |          |                                                                                                                                                                                                                                                                                                                                                                                                                                                           |          |                                                                                                                                                                              |
| Background/rationale      | 2        | Explain the scientific background and rationale for the investigation being reported                                                                                                                                                                                                                                                                                                                                                                      | 6        | “People with ID are often considered to be at greater risk of antipsychotic drug-induced movement side-effects than people without ID but no studies directly compare rates” |
| Objectives                | 3        | State specific objectives, including any prespecified hypotheses                                                                                                                                                                                                                                                                                                                                                                                          | 7        | “To compare the incidence of recorded movement side-effects in adults with and without ID who were prescribed antipsychotic drugs”.                                          |
| <b>Methods</b>            |          |                                                                                                                                                                                                                                                                                                                                                                                                                                                           |          |                                                                                                                                                                              |
| Study design              | 4        | Present key elements of study design early in the paper                                                                                                                                                                                                                                                                                                                                                                                                   | 7-9      | Data source, study cohort, covariates subheadings                                                                                                                            |
| Setting                   | 5        | Describe the setting, locations, and relevant dates, including periods of recruitment, exposure, follow-up, and data collection                                                                                                                                                                                                                                                                                                                           | 7-8      | Study cohort subheading                                                                                                                                                      |
| Participants              | 6        | (a) <i>Cohort study</i> —Give the eligibility criteria, and the sources and methods of selection of participants. Describe methods of follow-up<br><i>Case-control study</i> —Give the eligibility criteria, and the sources and methods of case ascertainment and control selection. Give the rationale for the choice of cases and controls<br><i>Cross-sectional study</i> —Give the eligibility criteria, and the sources and methods of selection of | 7-8      | Study cohort subheading<br>“all adults with ID... were extracted”                                                                                                            |

|                              |    |                                                                                                                                                                                      |     |                                                                                                                     |
|------------------------------|----|--------------------------------------------------------------------------------------------------------------------------------------------------------------------------------------|-----|---------------------------------------------------------------------------------------------------------------------|
|                              |    | participants                                                                                                                                                                         |     |                                                                                                                     |
|                              |    | (b) <i>Cohort study</i> —For matched studies, give matching criteria and number of exposed and unexposed                                                                             | 8   | “A comparison cohort... was extracted using stratified sampling within each GP practice with frequency matching...” |
|                              |    | <i>Case-control study</i> —For matched studies, give matching criteria and the number of controls per case                                                                           |     |                                                                                                                     |
| Variables                    | 7  | Clearly define all outcomes, exposures, predictors, potential confounders, and effect modifiers. Give diagnostic criteria, if applicable                                             | 7-9 | Read code lists described<br>Covariates described                                                                   |
| Data sources/<br>measurement | 8* | For each variable of interest, give sources of data and details of methods of assessment (measurement). Describe comparability of assessment methods if there is more than one group | 7   | Data source subheading                                                                                              |
| Bias                         | 9  | Describe any efforts to address potential sources of bias                                                                                                                            | 8   | “Comparison cohort matched to ensure similar population level characteristics across the two groups”                |
| Study size                   | 10 | Explain how the study size was arrived at                                                                                                                                            | 7   | “All adults with recorded ID”                                                                                       |

Continued on next page

|                        |     |                                                                                                                                                                                                                                                                                                           |         |                                                                                                                  |
|------------------------|-----|-----------------------------------------------------------------------------------------------------------------------------------------------------------------------------------------------------------------------------------------------------------------------------------------------------------|---------|------------------------------------------------------------------------------------------------------------------|
| Quantitative variables | 11  | Explain how quantitative variables were handled in the analyses. If applicable, describe which groupings were chosen and why                                                                                                                                                                              | 9       | Statistical analysis subheading                                                                                  |
| Statistical methods    | 12  | (a) Describe all statistical methods, including those used to control for confounding                                                                                                                                                                                                                     | 9       | “Multivariable mixed Poisson regression was used...”                                                             |
|                        |     | (b) Describe any methods used to examine subgroups and interactions                                                                                                                                                                                                                                       |         |                                                                                                                  |
|                        |     | (c) Explain how missing data were addressed                                                                                                                                                                                                                                                               | 9       | “It was not possible to estimate the daily dose for 5% of prescriptions and these were excluded from the study”. |
|                        |     | (d) <i>Cohort study</i> —If applicable, explain how loss to follow-up was addressed<br><i>Case-control study</i> —If applicable, explain how matching of cases and controls was addressed<br><i>Cross-sectional study</i> —If applicable, describe analytical methods taking account of sampling strategy | NA      |                                                                                                                  |
|                        |     | (e) Describe any sensitivity analyses                                                                                                                                                                                                                                                                     | 9       | “We conducted a sensitivity analysis...”                                                                         |
| <b>Results</b>         |     |                                                                                                                                                                                                                                                                                                           |         |                                                                                                                  |
| Participants           | 13* | (a) Report numbers of individuals at each stage of study—eg numbers potentially eligible, examined for eligibility, confirmed eligible, included in the study, completing follow-up, and analysed                                                                                                         | NA      |                                                                                                                  |
|                        |     | (b) Give reasons for non-participation at each stage                                                                                                                                                                                                                                                      | NA      |                                                                                                                  |
|                        |     | (c) Consider use of a flow diagram                                                                                                                                                                                                                                                                        | NA      |                                                                                                                  |
| Descriptive data       | 14* | (a) Give characteristics of study participants (eg demographic, clinical, social) and information on exposures and potential confounders                                                                                                                                                                  | 10      | Table 1                                                                                                          |
|                        |     | (b) Indicate number of participants with missing data for each variable of interest                                                                                                                                                                                                                       |         |                                                                                                                  |
|                        |     | (c) <i>Cohort study</i> —Summarise follow-up time (eg, average and total amount)                                                                                                                                                                                                                          | Table 1 | Total person years between first and last prescription, median years between first and last prescription         |
| Outcome data           | 15* | <i>Cohort study</i> —Report numbers of outcome events or summary measures over time                                                                                                                                                                                                                       | 10      | “The overall incidence of recorded movement side effects...”                                                     |
|                        |     | <i>Case-control study</i> —Report numbers in each exposure category, or summary measures of exposure                                                                                                                                                                                                      | Table 3 |                                                                                                                  |
|                        |     | <i>Cross-sectional study</i> —Report numbers of outcome events or summary measures                                                                                                                                                                                                                        | NA      |                                                                                                                  |
| Main results           | 16  | (a) Give unadjusted estimates and, if applicable, confounder-adjusted estimates and their precision                                                                                                                                                                                                       | 10      |                                                                                                                  |

|                                                                                                                  |         |
|------------------------------------------------------------------------------------------------------------------|---------|
| (eg, 95% confidence interval). Make clear which confounders were adjusted for and why they were included         | Table 2 |
| (b) Report category boundaries when continuous variables were categorized                                        | NA      |
| (c) If relevant, consider translating estimates of relative risk into absolute risk for a meaningful time period |         |

Continued on next page

For peer review only

1  
2  
3  
4  
5  
6  
7  
8  
9  
10  
11  
12  
13  
14  
15  
16  
17  
18  
19  
20  
21  
22  
23  
24  
25  
26  
27  
28  
29  
30  
31  
32  
33  
34  
35  
36  
37  
38  
39  
40  
41  
42  
43  
44  
45  
46  
47  
48  
49

|                          |    |                                                                                                                                                                            |               |                                                                                                                                                      |
|--------------------------|----|----------------------------------------------------------------------------------------------------------------------------------------------------------------------------|---------------|------------------------------------------------------------------------------------------------------------------------------------------------------|
| Other analyses           | 17 | Report other analyses done—eg analyses of subgroups and interactions, and sensitivity analyses                                                                             | 11<br>Table 4 | “Analysis restricted to periods when people were exclusively prescribed first- or second-generation antipsychotic drugs did not change the results”. |
| <b>Discussion</b>        |    |                                                                                                                                                                            |               |                                                                                                                                                      |
| Key results              | 18 | Summarise key results with reference to study objectives                                                                                                                   | 11            | “Our data suggest that people with ID are indeed more likely to experience movement side-effects of antipsychotic drugs”.                            |
| Limitations              | 19 | Discuss limitations of the study, taking into account sources of potential bias or imprecision. Discuss both direction and magnitude of any potential bias                 | 14-15         |                                                                                                                                                      |
| Interpretation           | 20 | Give a cautious overall interpretation of results considering objectives, limitations, multiplicity of analyses, results from similar studies, and other relevant evidence | 15            | “People with ID appear more susceptible to movement side-effects of antipsychotic drugs than people without ID”.                                     |
| Generalisability         | 21 | Discuss the generalisability (external validity) of the study results                                                                                                      |               |                                                                                                                                                      |
| <b>Other information</b> |    |                                                                                                                                                                            |               |                                                                                                                                                      |
| Funding                  | 22 | Give the source of funding and the role of the funders for the present study and, if applicable, for the original study on which the present article is based              | 5             | “The Baily Thomas Charitable Fund and the National Institute for Health Research”                                                                    |

\*Give information separately for cases and controls in case-control studies and, if applicable, for exposed and unexposed groups in cohort and cross-sectional studies.

**Note:** An Explanation and Elaboration article discusses each checklist item and gives methodological background and published examples of transparent reporting. The STROBE checklist is best used in conjunction with this article (freely available on the Web sites of PLoS Medicine at <http://www.plosmedicine.org/>, Annals of Internal Medicine at <http://www.annals.org/>, and Epidemiology at <http://www.epidem.com/>). Information on the STROBE Initiative is available at [www.strobe-statement.org](http://www.strobe-statement.org).

# BMJ Open

## Movement side-effects of antipsychotic drugs in adults with and without intellectual disability: UK population-based cohort study

|                                 |                                                                                                                                                                                                                                                                                                                                                                                                                                                                        |
|---------------------------------|------------------------------------------------------------------------------------------------------------------------------------------------------------------------------------------------------------------------------------------------------------------------------------------------------------------------------------------------------------------------------------------------------------------------------------------------------------------------|
| Journal:                        | <i>BMJ Open</i>                                                                                                                                                                                                                                                                                                                                                                                                                                                        |
| Manuscript ID                   | bmjopen-2017-017406.R1                                                                                                                                                                                                                                                                                                                                                                                                                                                 |
| Article Type:                   | Research                                                                                                                                                                                                                                                                                                                                                                                                                                                               |
| Date Submitted by the Author:   | 02-Jun-2017                                                                                                                                                                                                                                                                                                                                                                                                                                                            |
| Complete List of Authors:       | Sheehan, Rory; University College London, Division of Psychiatry<br>Horsfall, Laura; University College London, Research Department of Primary Care and Population Health<br>Strydom, Andre; Division of Psychiatry<br>Osborn, David; University College London, Division of Psychiatry<br>Walters, Kate; University College London, Research Department of Primary Care and Population Health<br>HASSIOTIS, ANGELA; University College London, Division of Psychiatry |
| <b>Primary Subject Heading</b>: | Mental health                                                                                                                                                                                                                                                                                                                                                                                                                                                          |
| Secondary Subject Heading:      | Pharmacology and therapeutics                                                                                                                                                                                                                                                                                                                                                                                                                                          |
| Keywords:                       | MENTAL HEALTH, PSYCHIATRY, Adverse events < THERAPEUTICS                                                                                                                                                                                                                                                                                                                                                                                                               |
|                                 |                                                                                                                                                                                                                                                                                                                                                                                                                                                                        |

SCHOLARONE™  
Manuscripts

Only

1  
2  
3 TITLE PAGE  
4  
5  
6

7 **Movement side-effects of antipsychotic drugs in adults with and without intellectual**  
8 **disability: UK population-based cohort study**  
9

10  
11 Dr Rory Sheehan\*, MSc, Division of Psychiatry, University College London

12  
13 Dr Laura Horsfall\*, PhD, Research Department of Primary Care and Population Health,  
14 University College London  
15

16  
17 Dr André Strydom, PhD, Division of Psychiatry, University College London

18  
19 Professor David Osborn, PhD, Division of Psychiatry, University College London

20  
21 Dr Kate Walters, PhD, Research Department of Primary Care and Population Health,  
22 University College London  
23

24  
25 Professor Angela Hassiotis, PhD, Division of Psychiatry, University College London  
26

27  
28 \*Rory Sheehan and Laura Horsfall contributed equally to this work.  
29  
30

31  
32 Corresponding author: Dr Rory Sheehan

33  
34 Address: Division of Psychiatry, University College London, 6<sup>th</sup> Floor Maple House, 149  
35 Tottenham Court Road, London W1T 7NF  
36

37 Telephone: 0207-679-9201

38  
39 E-mail: r.sheehan@ucl.ac.uk  
40  
41  
42  
43  
44  
45  
46  
47  
48  
49  
50  
51  
52  
53  
54  
55  
56  
57  
58  
59  
60



1  
2  
3 ABSTRACT  
4  
5

6 **Movement side-effects of antipsychotic drugs in adults with and without intellectual**  
7 **disability: UK population-based cohort study**  
8  
9

10  
11 **Objectives** To measure the incidence of movement side-effects of antipsychotic drugs in  
12 adults with intellectual disability and compare rates with adults without intellectual  
13 disability.  
14  
15

16  
17  
18  
19 **Design** Cohort study using data from The Health Improvement Network  
20

21  
22 **Setting** UK Primary care  
23  
24

25  
26 **Participants** Adults with intellectual disability prescribed antipsychotic drugs matched to a  
27 control group of adults without intellectual disability prescribed antipsychotic drugs.  
28  
29

30  
31 **Outcome measures** New records of movement side-effect including, acute dystonias,  
32 akathisia, Parkinsonism, tardive dyskinesia, and neuroleptic malignant syndrome.  
33  
34

35  
36  
37 **Results** 9,013 adults with intellectual disability and a control cohort of 34,242 adults without  
38 intellectual disability together contributed 148,709 person-years data. The overall incidence  
39 of recorded movement side-effects was 275 per 10,000 person-years (95% confidence  
40 interval 256-296) in the intellectual disability group and 248 per 10,000 person-years (95%  
41 confidence interval 237-260) in the control group. The incidence of any recorded movement  
42 side-effect was significantly greater in people with intellectual disability compared to those  
43 without (incidence rate ratio 1.30, 95% confidence interval 1.18 to 1.42,  $p < 0.001$ , after  
44 adjustment for potential confounders), with Parkinsonism and akathisia showing the  
45 greatest difference between the groups. Neuroleptic malignant syndrome, although  
46 occurring infrequently, was three times more common in people with intellectual disability  
47 prescribed antipsychotic drugs (incidence rate ratio 3.03, 95% confidence interval 1.26 to  
48 7.30,  $p = 0.013$ ). Differences in rates of movement side-effects between the groups were not  
49  
50  
51  
52  
53  
54  
55  
56  
57  
58  
59  
60

1  
2  
3 due to differences in the proportions prescribed first- and second-generation antipsychotic  
4 drugs.  
5  
6  
7

8 **Conclusions** This study provides evidence to substantiate the long-held assumption that  
9 people with intellectual disability are more susceptible to movement side-effects of  
10 antipsychotic drugs. Assessment for movement side-effects should be integral to  
11 antipsychotic drug monitoring in people with intellectual disability. Regular medication  
12 review is essential to ensure optimal prescribing in this group.  
13  
14  
15  
16  
17  
18  
19  
20  
21  
22  
23  
24  
25  
26  
27  
28  
29  
30  
31  
32  
33  
34  
35  
36  
37  
38  
39  
40  
41  
42  
43  
44  
45  
46  
47  
48  
49  
50  
51  
52  
53  
54  
55  
56  
57  
58  
59  
60

## ARTICLE SUMMARY

### Strengths and limitations of this study

- This study includes a very large number of people with and without intellectual disability who have been prescribed antipsychotic drugs.
- The Health Improvement Network is a UK primary care database that contains accurate recording of demographic and clinical information and drug prescribing.
- This is the first study to directly compare the rates of movement side-effects of antipsychotic drugs between people with intellectual disability and those without, and offers new insights into the risk-benefit ratio of antipsychotic drug prescribing to people with intellectual disability.
- Recording of movement side-effects of antipsychotic drugs in primary care has not been validated.
- Antipsychotic drugs prescribed outside primary care and movement side-effects identified in other settings may not have been recorded by our method.

### FUNDING STATEMENT

This work was supported by The Baily Thomas Charitable Fund grant number 518669 and the National Institute for Health Research grant reference RP-DG-0611-10003. The funders had no role in study design, data collection and analysis, decision to publish, or preparation of the manuscript.

### COMPETING INTERESTS

Rory Sheehan reports no conflicts of interest.

Laura Horsfall reports no conflicts of interest.

André Strydom reports grants from Roche pharmaceuticals, outside the submitted work.

David Osborn reports no conflicts of interest.

Kate Walters reports no conflicts of interest.

Angela Hassiotis reports no conflicts of interest.

### AUTHOR CONTRIBUTIONS

Rory Sheehan developed the idea and method for the study, interpreted the results, and wrote the manuscript. Rory Sheehan is guarantor.

Laura Horsfall developed the idea and method for the study, performed the data extraction and analysis, interpreted the results, and wrote the manuscript.

André Strydom developed the idea and method for the study, interpreted the results, and wrote the manuscript.

David Osborn developed the idea and method for the study, interpreted the results, and wrote the manuscript.

Kate Walters developed the idea and method for the study, interpreted the results, and wrote the manuscript.

Angela Hassiotis developed the idea and method for the study, interpreted the results, and wrote the manuscript.

### DATA SHARING STATEMENT

Copies of Read code lists used in this study are available from the authors, on request.

1  
2  
3 MANUSCRIPT  
4  
5  
6

7 **Movement side-effects of antipsychotic drugs in adults with and without intellectual**  
8 **disability: UK population-based cohort study**  
9

10  
11  
12 Introduction  
13

14  
15 Movement (extra-pyramidal) side-effects, including acute dystonias, akathisia,  
16 Parkinsonism, and tardive dyskinesia, are a well-recognised complication of antipsychotic  
17 drugs which are thought to occur secondary to antagonism of dopamine D2 receptors in the  
18 striatum and meso-cortex.<sup>1</sup> Movement side-effects can be distressing, disabling, and  
19 difficult to treat and their presence is associated with poor medication compliance, stigma,  
20 and reduced quality of life.<sup>2</sup>  
21  
22  
23  
24  
25  
26

27  
28 Intellectual disability (ID) is a lifelong condition characterised by global deficits in cognitive  
29 and adaptive functioning. People with ID experience relatively high rates of mental illness<sup>3</sup>  
30 and many worldwide and in the UK are prescribed antipsychotic drugs. There has been  
31 renewed focus on the appropriateness of antipsychotic drug prescribing in people with ID  
32 following recent evidence that antipsychotic drugs are often used in the absence of an  
33 underlying diagnosed mental illness,<sup>4</sup> in many cases in an attempt to manage challenging  
34 behaviour, despite a lack of evidence that they are effective in this context.<sup>5</sup> There has been  
35 relatively little formal investigation of antipsychotic drug side-effects in people with ID and  
36 most of our knowledge is extrapolated from studies conducted in people of average  
37 intelligence. People with ID are often considered to be at greater risk of antipsychotic drug-  
38 induced movement side-effects than people without ID<sup>6</sup> but no studies directly compare  
39 rates between the two groups. Furthermore, knowledge of a specific mechanism that might  
40 underpin any association between ID and movement side-effects extends only to a vague  
41 theory that organic brain dysfunction makes centrally-mediated side-effects of psychotropic  
42 drugs more likely.<sup>7</sup>  
43  
44  
45  
46  
47  
48  
49  
50  
51  
52  
53  
54  
55  
56  
57  
58  
59  
60

1  
2  
3 We undertook a cohort study using a large nationally-representative database to compare  
4 the incidence of recorded movement side-effects in adults with and without ID who are  
5 prescribed antipsychotic drugs.  
6  
7

## 8 9 10 Methods

### 11 12 13 *Data source*

14  
15  
16  
17 Data were obtained from The Health Improvement Network (THIN), a large UK primary care  
18 database that contains the electronic health records of more than 3.7 million active patients  
19 in over 550 general practices (<http://www.epic-uk.org/our-data/our-data.shtml>). The  
20 patients included in the database are representative of the UK population in age, sex, and  
21 morbidity and mortality.<sup>8,9</sup> The vast majority of people with intellectual disability in the UK  
22 live in the community and are registered with a General Practitioner (primary care  
23 physician) who provides routine and ongoing care, and who acts as gatekeeper for hospital-  
24 based specialists, including psychiatrists. The THIN database contains clinical records added  
25 by General Practitioners using a clinical dictionary of Read codes. Read codes are  
26 standardised clinical terms that can be used as shorthand for clinicians to record certain  
27 patient characteristics (such as occupation and living circumstances) and the content of a  
28 consultation.<sup>10</sup> Individual Read codes exist to cover the variety of signs, symptoms and  
29 diagnoses that an individual may have, as well as test results and surgical or therapeutic  
30 treatments. Recording of illness in primary care records has been shown to be accurate and  
31 all prescribed medication must be issued through the electronic system. National Health  
32 Service drug budgets flow through primary care and General Practitioners issue most  
33 prescriptions directly, including those for psychotropic drugs. The primary care record  
34 therefore is a suitable means of conducting pharmaco-epidemiological research.  
35  
36  
37  
38  
39  
40  
41  
42  
43  
44  
45  
46  
47  
48

49  
50  
51 THIN data are pseudonymised at source and made available to researchers who have  
52 purchased a license. THIN has overall ethical approval to collate data and this study received  
53 approval from the THIN Scientific Review Committee (reference 14-071).  
54  
55

### 56 57 58 *Study cohort*

1  
2  
3  
4  
5 For this study, all adults with recorded ID and a history of oral antipsychotic drug  
6 prescription were extracted using a previously-defined and tested list of diagnostic Read  
7 codes (including codes for ID and conditions associated with ID) and antipsychotic drug  
8 codes,<sup>4</sup> based on chapters of the *British National Formulary*. General practitioners are  
9 incentivised by the Quality Outcomes Framework (QOF) to keep a register of people with ID  
10 which improves recording in the database. The study period was 1<sup>st</sup> January 1999 to 31<sup>st</sup>  
11 December 2014. Entry to the cohort was set as the date of the first antipsychotic drug  
12 prescription issued after the latest of; registration with the GP practice contributing data;  
13 the patient's 18<sup>th</sup> birthday; the start of the study period; the date the practice achieved  
14 compliance with standard measures of data quality.<sup>11,12</sup> People contributed person-years  
15 (PYs) of data from entry to cohort exit. Exit from the cohort was defined as the first of; the  
16 final antipsychotic drug prescription plus the length of the prescription; de-registration with  
17 the GP practice contributing data; the end of the study period; or death.  
18  
19  
20  
21  
22  
23  
24  
25  
26  
27  
28

29  
30 A comparison cohort of people prescribed antipsychotic drugs but without ID was extracted  
31 using stratified sampling within each GP practice with frequency matching to ensure similar  
32 population-level characteristics across the two cohorts in terms of age, gender, and year of  
33 antipsychotic prescription. Up to six people without ID were selected for every person with  
34 ID and the same criteria were used to define cohort entry and exit.  
35  
36  
37  
38  
39

40 A Read code list for movement side-effects was developed using previously-described  
41 methodology and applied to the cohort to determine incidence of movement side-effects<sup>13</sup>  
42 (supplementary data). Movement side-effects were categorised as; acute dystonias;  
43 akathisia; Parkinsonism; or tardive dyskinesia; in accordance with orthodox classification. A  
44 separate category was established for neuroleptic malignant syndrome (NMS), being a very  
45 specific adverse effect, and a further category included for broad codes which could not be  
46 sub-categorised. Prescriptions for selected antimuscarinic drugs (procyclidine,  
47 orphenadrine, trihexyphenidyl) were used as proxy indicators of movement side-effects in  
48 those prescribed antipsychotic drugs. People were defined as having a history of movement  
49 disorder if a relevant Read code was applied (or antimuscarinic drug prescribed) prior to  
50  
51  
52  
53  
54  
55  
56  
57  
58  
59  
60

1  
2  
3 cohort entry or within six months of registration with the practice, as this has been shown  
4 to improve the validity of incidence calculations.<sup>14</sup>  
5  
6

### 7 8 *Covariates* 9

10  
11 Sociodemographic covariates included age, sex, calendar year, and the Townsend  
12 Deprivation Score (a composite score in fifths based on postcode and Census recording of  
13 local unemployment, car ownership, home ownership, and overcrowding).<sup>15</sup> Other  
14 covariates included history of antipsychotic use at cohort entry, antipsychotic average daily  
15 dose, and days on treatment between the start and end of follow-up. Average daily dose  
16 was measured as Chlorpromazine equivalents (CPZE) to account for polypharmacy and  
17 those who switched drugs during follow-up. Where we were unable to extract daily dose  
18 data (for example, in the minority of cases where the duration of a prescription was not  
19 recorded) the prescribed dose for the previous or subsequent prescription for the same  
20 drug and formulation was used. It was not possible to estimate the daily dose for 5% of  
21 prescriptions and these were excluded from the study. Prescriptions for drug doses above  
22 three times the upper licensed limit were excluded as probable coding errors (<1%).  
23  
24  
25  
26  
27  
28  
29  
30  
31  
32  
33

### 34 35 *Statistical analysis* 36

37  
38 Multivariable mixed Poisson regression was used to calculate incident rates of movement  
39 disorders during exposure to antipsychotic drugs in people with and without ID by calendar  
40 year, adjusted for any temporal changes in age and sex. Incidence rate was defined as the  
41 number of new events of interest / the duration that the cohort was at risk. First we were  
42 interested in the incidence of new cases of any movement disorder. Participants exited the  
43 cohort when they were first diagnosed with any movement disorder as they were no longer  
44 considered at risk of a new diagnosis after this date. For calculating the incidence of  
45 subtypes of movement side-effect, participants exited the cohort after they were diagnosed  
46 with the type of movement side-effect of interest as they were no longer considered at risk  
47 of that type of movement side-effect after that date. They remained in the cohort for the  
48 purposes of being diagnosed with other types of movement side-effect as an individual  
49 participant may develop more than one type of movement side-effect of antipsychotic drug.  
50  
51  
52  
53  
54  
55  
56  
57  
58  
59  
60



1  
2  
3  
4  
5 General practice was included as a random effect to account for any data clustering.  
6  
7 Calendar year was initially modelled as a continuous variable and we then used the  
8  
9 likelihood ratio test to compare this with a model in which year was entered as a categorical  
10  
11 variable to examine the possibility of non-linear time trends.  
12

13  
14 Multivariable mixed Poisson regression was also used to compare the rates of movement  
15  
16 disorder during exposure to antipsychotic drugs in people with and without ID, adjusted for  
17  
18 covariates. We conducted a sensitivity analysis where we restricted the analysis to time  
19  
20 periods when people were exclusively prescribed first- or second-generation antipsychotic  
21  
22 drugs, and further when we restricted the analysis to times when only risperidone was  
23  
24 prescribed. All analyses were repeated after excluding people with a diagnosis of idiopathic  
25  
26 Parkinson's disease.  
27

28 We considered a p-value of 0.05 to be statistically significant (two-tailed) and used Stata  
29  
30 version 13 for all analyses (StataCorp, TX).  
31

### 32 33 Results 34

35  
36 In total 9,039 people with ID met inclusion criteria and were matched to 34,242 people  
37  
38 without ID, and together contributed 148,709 person-years (PYs) data. The two cohorts  
39  
40 were similar in terms of age, sex, level of social deprivation, and history of movement  
41  
42 disorder at cohort entry (table 1). The prevalence of movement disorder at baseline was  
43  
44 slightly higher for people with ID and a history of antipsychotic use (31%) compared to those  
45  
46 without ID and a history of antipsychotic drug use (24%) but the proportions of those with a  
47  
48 history of movement disorder without antipsychotic drug use were equal (6%) at cohort  
49  
50 entry. Average daily dose of antipsychotic was similar between the two groups but those  
51  
52 with ID had longer time periods between their first and last antipsychotic prescription and  
53  
54 more days on treatment between those dates. Table 2 shows the distribution of  
55  
56 antipsychotic drugs prescribed to the study cohort. Risperidone was the most common drug  
57  
58 prescribed in the ID cohort (28.5% prescriptions to people with ID, 14.7% prescriptions in  
59  
60

1  
2  
3 the non-ID cohort); other drugs were prescribed in roughly equal proportions between the  
4 two groups.  
5  
6

7  
8 [Table 1 near here]  
9

10  
11 [Table 2 near here]  
12  
13

14  
15 The overall incidence of recorded movement side-effects was 275 per 10,000PYs (95%  
16 confidence interval (CI) 256-296) in the ID group and 248 per 10,000PYs (95%CI 237-260) in  
17 the non-ID group (table 3). Parkinsonism was the most commonly recorded movement side-  
18 effect in both groups. After adjustment, the incidence rate of any movement disorder was  
19 30% higher in people with ID compared to those without ID (IRR 1.30, 95%CI 1.18 to 1.42,  
20  $p < 0.001$ ). Similar differences in movement side-effect recording were noted when defined  
21 by diagnostic Read codes or by proxy, using prescription for antimuscarinic drugs. The  
22 incidence rates of akathisia, Parkinsonism, and neuroleptic malignant syndrome were  
23 significantly higher in those with ID compared with those without ID.  
24  
25  
26  
27  
28  
29  
30  
31

32  
33 Analysis restricted to periods when people were exclusively prescribed first- or second-  
34 generation antipsychotic drugs did not change the results; movement side-effects were still  
35 significantly more likely to be recorded in people with ID compared to those without (table  
36 4). Excluding people with Parkinson's disease from the analysis ( $n=451$ ) had no meaningful  
37 effect on any of the results.  
38  
39  
40  
41  
42

43  
44 [Table 3 near here]  
45  
46

47  
48 [Table 4 near here]  
49  
50

51 Time trend analysis showed that the incidence of recording of movement side-effects in  
52 those prescribed antipsychotic drugs fell significantly over the course of the study period in  
53 both groups (figure 1); each calendar year was associated with a 5% decline in the recording  
54 of movement side-effects in people with ID (95%CI 2-8%,  $p < 0.0001$ ) and a 7% decline in  
55 people without ID (95%CI 5-9%,  $p < 0.001$ ), after accounting for changes in cohort age and  
56  
57  
58  
59  
60

1  
2  
3 sex. Prescriptions for antimuscarinic drugs declined by 3% per year in people with ID (95%CI  
4 1-5%,  $p=0.002$ ) and 5% per year in people without ID (95%CI 4-7%,  $p<0.001$ ). Average daily  
5 antipsychotic dose, measured in Chlorpromazine equivalents, remained broadly constant  
6 during the study period (data not shown).  
7  
8  
9

10  
11  
12 [Figure 1a and figure 1b near here]  
13

### 14 15 Discussion 16

17  
18  
19 People with ID have long been considered at greater risk of adverse side-effects of  
20 antipsychotic drugs. However to date very little evidence has been presented to  
21 substantiate this belief. Our data suggest that people with ID are more likely to experience  
22 movement side-effects of antipsychotic drugs; this finding is robust and persists when  
23 movement side-effects are defined by diagnostic Read code alone and when they are  
24 measured using prescription of anti-muscarinic drugs as proxy.  
25  
26  
27  
28  
29

30  
31 Most people in our cohort received a second-generation antipsychotic drug. The types of  
32 drugs that were prescribed in our study were broadly similar between the group with ID and  
33 the group without, and were consistent with other recent data examining antipsychotic  
34 prescribing in community-dwelling adults living in the UK.<sup>16</sup> The exception was risperidone,  
35 which was prescribed more frequently to people with ID; this accords with other studies<sup>17</sup>  
36 and is likely to reflect an attempt by clinicians to prescribe the antipsychotic with greatest  
37 (albeit still limited) evidence of benefit for challenging behaviour in people with ID.<sup>5,18</sup> The  
38 difference in incidence of movement side-effects between people with and without ID  
39 remained when first- and second-generation agents were considered separately, and when  
40 risperidone was considered alone, suggesting that headline differences between the groups  
41 were not due to different prescribing practices.  
42  
43  
44  
45  
46  
47  
48  
49  
50

51  
52 Although their improved movement side-effect profile has been considered a major  
53 advantage of second-generation antipsychotic drugs, more recent evaluation of the  
54 evidence suggests that the initial enthusiasm for second-generation agents was misplaced  
55 and largely based on studies that made unequal comparisons between second-generation  
56  
57  
58  
59  
60

1  
2  
3 and high-potency first-generation drugs.<sup>19,20</sup> In this study we did not set out to compare  
4 movement side-effects between first and second-generation agents but we observed that  
5 the prescription of second-generation agents was associated with a slightly lower incidence  
6 of recorded movement side-effects in people with and without ID; clearly further work is  
7 needed to provide definitive data on this contentious aspect of antipsychotic drug side-  
8 effects.  
9

10  
11  
12  
13  
14  
15  
16 There is a lack of work with which we can directly compare our results; previous studies that  
17 investigate movement disorders in people with ID who take anti-psychotic drugs have used  
18 differing methods to define and ascertain movement disorder, selected particular  
19 populations (often convenience sampling those residing in institutions), and tend to report  
20 point prevalence figures. None have directly compared rates of movement side-effect in  
21 people with ID to controls without ID. Nevertheless, it is clear that antipsychotic drug-  
22 induced movement side-effects are reasonably common in people with ID. In once recent  
23 study of hospitalised patients with borderline-mild ID and challenging behaviour, almost half  
24 were found to have a movement disorder, and the presence of movement disorder was  
25 more likely in those prescribed antipsychotic medication.<sup>21</sup> The most common type was  
26 Parkinsonism, as in our study. De Kuyper and colleagues in the Netherlands report that just  
27 over half of their sample with ID who had been taking antipsychotic drugs for more than a  
28 year had evidence of movement side-effects.<sup>22</sup>  
29  
30  
31  
32  
33  
34  
35  
36  
37  
38  
39

40  
41 It is interesting that in our study the rates of recording of tardive dyskinesia were relatively  
42 low and it was not more frequently recorded in people with ID. Previous work has shown  
43 tardive dyskinesia to be common; one study of institutionalised adults with ID taking long-  
44 term antipsychotic drugs found a prevalence rate of tardive dyskinesia of 45%.<sup>23</sup>  
45 Spontaneous dyskinesias are also common in people with ID<sup>24</sup> and it is possible that drug-  
46 induced tardive dyskinesia may be misinterpreted as part of the underlying ID and under-  
47 recorded, an example of 'diagnostic overshadowing'. Conversely, it is also possible that  
48 background dyskinesia related to ID might be misinterpreted as being the result of  
49 antipsychotic drugs. Several assessment scales are available for measuring movement side-  
50 effects of antipsychotic drugs and may be utilised in monitoring, although there are obvious  
51  
52  
53  
54  
55  
56  
57  
58  
59  
60

1  
2  
3 challenges in assessment of subjective symptoms (such as akathisia) people with ID who  
4 may have limited understanding and verbal communication ability.<sup>25,26,27</sup>  
5  
6  
7

8 Neuroleptic malignant syndrome is a rare idiosyncratic complication of antipsychotic  
9 therapy consisting of fever, muscle rigidity, autonomic dysfunction, and alterations in  
10 cognitive state. We found a significantly increased incidence of neuroleptic malignant  
11 syndrome amongst people with ID, although the low number of recorded events in the  
12 database means our results need to be interpreted with caution. An association between  
13 neuroleptic malignant syndrome and ID has been demonstrated previously<sup>28,29</sup> and this,  
14 combined with the seriousness of the condition (particularly in people with ID<sup>29,30</sup>), warrants  
15 further attention.  
16  
17  
18  
19  
20  
21  
22

23  
24 We observed a decline in the recording of movement side-effects in both groups over the  
25 past 15 years. It might be that; clinicians have focused their attention on measuring and  
26 managing metabolic complications; the wide scale switch from first- to second-generation  
27 antipsychotic drugs<sup>31</sup> has partially contributed to an actual decrease in the rate of  
28 movement side-effect; the clinical expectation of reduced movement side-effects with  
29 newer drugs has reduced vigilance and recognition of these side-effects.  
30  
31  
32  
33  
34  
35

### 36 *Strengths and limitations*

37  
38  
39

40 This is the first study to directly compare the rate of antipsychotic drug-induced movement  
41 side-effects between people with and without ID. Our findings are strengthened by the large  
42 numbers of people included and the sample being drawn from a representative community  
43 population. UK general practices are incentivised to maintain an accurate list of people with  
44 ID and as prescriptions are also accurately recorded in THIN our results are generalisable  
45 across settings to all people with intellectual disability who take antipsychotic drugs. We  
46 excluded depot antipsychotic preparations (and the small number of prescriptions that may  
47 have been issued in secondary care) and therefore might have slightly underestimated  
48 exposure to antipsychotic drugs.  
49  
50  
51  
52  
53  
54  
55  
56  
57  
58  
59  
60

1  
2  
3 A limitation of our work that is common across observational studies that utilise routinely-  
4 collected health data is the lack of direct validation of diagnoses. The Read code list for  
5 movement side-effects was devised using a comprehensive methodology and with input  
6 from practising primary and specialist secondary care physicians but not tested against 'gold  
7 standard' methods for identifying movement side-effects. We assume that relevant Read  
8 codes added to patient records during exposure to antipsychotic drugs represent adverse  
9 side-effects; this may not always be the case and symptoms of movement disorder may  
10 arise independently or in response to other prescribed medications (such as anti-  
11 depressants and anti-epileptic drugs) that we did not measure. Our method measures only  
12 recorded side-effects, that is, people must consult their General Practitioner for the side-  
13 effect to be noted formally. Even when seen by a clinician, there is evidence that movement  
14 side-effects might be missed.<sup>32</sup> It is possible, therefore, that our results under-estimate the  
15 true rate of movement side-effect of antipsychotic drugs. How this might bias the  
16 comparison between ID and non-ID groups is not clear. People with ID have lower health  
17 literacy, lack knowledge of psychotropic drug side-effects,<sup>33</sup> and may encounter barriers to  
18 accessing primary care,<sup>34</sup> and hence be less likely to present to primary care when  
19 experiencing treatment side-effects. Conversely, people with ID may be monitored more  
20 closely by carers or by pro-active General Practitioners who recognise the higher health  
21 need in this group, for example, by offering an annual health check. Some cases of  
22 movement side-effects may have not been recorded in the primary care database if people  
23 who are in contact with specialist services contact their psychiatrist directly, rather than  
24 visiting their General Practitioner. Neuroleptic malignant syndrome may be underestimated  
25 either because milder forms are missed, or because it is more likely to be treated in the  
26 acute hospital.

27  
28  
29  
30  
31  
32  
33  
34  
35  
36  
37  
38  
39  
40  
41  
42  
43  
44  
45  
46  
47 Further work will be needed to elucidate the potential pathophysiological mechanism  
48 underlying the observed association between ID and movement side-effects of  
49 antipsychotic drugs.  
50  
51

## 52 53 54 Conclusions 55 56 57 58 59 60

1  
2  
3 Movement side-effects are only one aspect of a number of antipsychotic drug adverse  
4 effects. They can impact medication compliance, quality of life, and compound the stigma of  
5 mental illness and/or intellectual disability.<sup>35,36</sup> They can be difficult to recognise, to treat  
6 and, in the case of the tardive syndromes, can persist or even worsen on withdrawal of the  
7 offending drug. People with ID appear more susceptible to movement side-effects of  
8 antipsychotic drugs than people without ID and this should be considered when treatment  
9 decisions are made, especially given the relatively high rates of other comorbidities in this  
10 population. There is evidence that movement side-effects of antipsychotic drugs are poorly  
11 assessed in people with ID who are under the care of secondary care services<sup>37</sup>; this  
12 situation must change if medication is to be used in the safest and most effective way  
13 possible.  
14  
15  
16  
17  
18  
19  
20  
21  
22  
23

24 Our data support a modest potential benefit of second generation antipsychotic drugs in  
25 reducing the incidence of movement side-effects, but more work is needed to confirm this  
26 finding, and it must be balanced against the increased propensity of second-generation  
27 agents to cause metabolic side-effects.  
28  
29  
30  
31  
32

33 There has been much recent public and professional interest in the prescription of  
34 antipsychotic drugs to people with intellectual disability and UK national policy supports  
35 attempts to reduce the prescribing of antipsychotic drugs for challenging behaviour  
36 ([https://www.england.nhs.uk/wp-content/uploads/2016/06/stopping-over-](https://www.england.nhs.uk/wp-content/uploads/2016/06/stopping-over-medication.pdf)  
37 [medication.pdf](https://www.england.nhs.uk/wp-content/uploads/2016/06/stopping-over-medication.pdf)). We recently showed that reduction or discontinuation of antipsychotic  
38 drugs in people with ID and challenging behaviour (but without severe mental illness) risks  
39 harm as well as providing potential benefits and advocate individual treatment decisions in  
40 this group.<sup>38</sup> The current work informs the risk-benefit analysis undertaken as part of  
41 antipsychotic drug prescribing in people with ID and reinforces the need for regular and  
42 effective medication review, which must include assessment of possible movement side-  
43 effects.  
44  
45  
46  
47  
48  
49  
50  
51  
52  
53  
54  
55  
56  
57  
58  
59  
60

## References

1. Marsden C, Jenner P. The pathophysiology of extrapyramidal side-effects of neuroleptic drugs. *Psychological medicine* 1980; **10**: 55-72.
2. Leucht S, Wahlbeck K, Hamann J, Kissling W. New generation antipsychotics versus low-potency conventional antipsychotics: a systematic review and meta-analysis. *The Lancet* 2003; **361**: 1581-9.
3. Cooper S-A, Smiley E, Morrison J, Williamson A, Allan L. Mental ill-health in adults with intellectual disabilities: prevalence and associated factors. *The British Journal of Psychiatry* 2007; **190**: 27-35.
4. Sheehan R, Hassiotis A, Walters K, Osborn D, Strydom A, Horsfall L. Mental illness, challenging behaviour, and psychotropic drug prescribing in people with intellectual disability: UK population based cohort study. *BMJ* 2015; **351**: h4326.
5. Deb S, Sohanpal S, Soni R, Lentre L, Unwin G. The effectiveness of antipsychotic medication in the management of behaviour problems in adults with intellectual disabilities. *Journal of Intellectual Disability Research* 2007; **51**: 766-77.
6. Arnold LE. Clinical pharmacological issues in treating psychiatric disorders of patients with mental retardation. *Annals of clinical psychiatry* 1993; **5**: 189-97.
7. Cunningham-Owens DG. Special populations. A guide to extrapyramidal side-effects of antipsychotic drugs. 2nd ed. Cambridge, UK: Cambridge University Press; 2014.
8. Blak B, Thompson M, Dattani H, Bourke A. Generalisability of The Health Improvement Network (THIN) database: demographics, chronic disease prevalence and mortality rates. *Journal of Innovation in Health Informatics* 2011; **19**: 251-5.
9. Bourke A, Dattani H, Robinson M. Feasibility study and methodology to create a quality-evaluated database of primary care data. *Journal of Innovation in Health Informatics* 2004; **12**: 171-7.
10. Booth N. What are the Read codes? *Health libraries review* 1994; **11**: 177-82.
11. Maguire A, Blak BT, Thompson M. The importance of defining periods of complete mortality reporting for research using automated data from primary care. *Pharmacoepidemiology and drug safety* 2009; **18**: 76-83.
12. Horsfall L, Walters K, Petersen I. Identifying periods of acceptable computer usage in primary care research databases. *Pharmacoepidemiology and drug safety* 2013; **22**: 64-9.
13. Davé S, Petersen I. Creating medical and drug code lists to identify cases in primary care databases. *Pharmacoepidemiology and drug safety* 2009; **18**: 704-7.



14. Lewis JD, Bilker WB, Weinstein RB, Strom BL. The relationship between time since registration and measured incidence rates in the General Practice Research Database. *Pharmacoepidemiology and drug safety* 2005; **14**: 443-51.
15. Townsend P, Phillimore P, Beattie A. Health and deprivation: inequality and the North. Routledge; 1988.
16. Marston L, Nazareth I, Petersen I, Walters K, Osborn DP. Prescribing of antipsychotics in UK primary care: a cohort study. *BMJ Open* 2014; **4**: e006135.
17. Frighi V, Stephenson MT, Morovat A, et al. Safety of antipsychotics in people with intellectual disability. *The British Journal of Psychiatry* 2011; **199**: 289-95.
18. Gagiano C, Read S, Thorpe L, Eerdeken M, Van Hove I. Short-and long-term efficacy and safety of risperidone in adults with disruptive behavior disorders. *Psychopharmacology* 2005; **179**: 629-36.
19. Leucht S, Cipriani A, Spineli L, et al. Comparative efficacy and tolerability of 15 antipsychotic drugs in schizophrenia: a multiple-treatments meta-analysis. *The Lancet* 2013; **382**: 951-62.
20. Peluso MJ, Lewis SW, Barnes TR, Jones PB. Extrapyramidal motor side-effects of first-and second-generation antipsychotic drugs. *The British Journal of Psychiatry* 2012; **200**: 387-92.
21. Scheifes A, Walraven S, Stolker JJ, et al. Movement Disorders in Adults With Intellectual Disability and Behavioral Problems Associated With Use of Antipsychotics. *Journal of clinical psychopharmacology* 2016; **36**: 308-13.
22. de Kuijper G, Mulder H, Evenhuis H, Scholte F, Visser F, Hoekstra PJ. Determinants of physical health parameters in individuals with intellectual disability who use long-term antipsychotics. *Research in developmental disabilities* 2013; **34**: 2799-809.
23. Matson JL, Fodstad JC, Neal D, Dempsey T, Rivet TT. Risk factors for tardive dyskinesia in adults with intellectual disability, comorbid psychopathology, and long-term psychotropic use. *Research in developmental disabilities* 2010; **31**: 108-16.
24. Rogers D, Karki C, Bartlett C, Pocock P. The motor disorders of mental handicap. An overlap with the motor disorders of severe psychiatric illness. *The British Journal of Psychiatry* 1991; **158**: 97-102.
25. Guy W. Abnormal involuntary movement scale. ECDEU Assessment Manual for Psychopharmacology. Washington, DC: US Department of Health, Education and Welfare; 1976.
26. Barnes TR. A rating scale for drug-induced akathisia. *The British Journal of Psychiatry* 1989; **154**: 672-6.
27. Simpson G, Angus J. A rating scale for extrapyramidal side effects. *Acta Psychiatrica Scandinavica* 1970; **45**: 11-9.

- 1  
2  
3 28. Viejo L, Morales V, Punal P, Perez J, Sancho R. Risk factors in neuroleptic malignant  
4 syndrome. A case–control study. *Acta Psychiatrica Scandinavica* 2003; **107**: 45-9.  
5  
6 29. Shalev A, Munitz H. The neuroleptic malignant syndrome: agent and host interaction. *Acta*  
7 *Psychiatrica Scandinavica* 1986; **73**: 337-47.  
8  
9 30. Boyd RD. Neuroleptic malignant syndrome and mental retardation: review and analysis of 29  
10 cases. *American journal on mental retardation* 1993; **98**: 143-55.  
11  
12 31. Verdoux H, Tournier M, Begaud B. Antipsychotic prescribing trends: a review of  
13 pharmaco-epidemiological studies. *Acta Psychiatrica Scandinavica* 2010; **121**: 4-10.  
14  
15 32. Haddad PM, Dursun SM. Neurological complications of psychiatric drugs: clinical features  
16 and management. *Human Psychopharmacology: Clinical and Experimental* 2008; **23**: S15-S26.  
17  
18 33. Crossley R, Withers P. Antipsychotic medication and people with intellectual disabilities:  
19 their knowledge and experiences. *Journal of Applied Research in Intellectual Disabilities* 2009; **22**: 77-  
20 86.  
21  
22 34. Lennox N, Diggins J, Ugoni A. The general practice care of people with intellectual disability:  
23 barriers and solutions. *Journal of Intellectual Disability Research* 1997; **41**: 380-90.  
24  
25 35. Schouten HJ, Knol W, Egberts TC, Schobben AF, Jansen PA, van Marum RJ. Quality of life of  
26 elderly patients with antipsychotic-induced parkinsonism: A cross-sectional study. *Journal of the*  
27 *American Medical Directors Association* 2012; **13**: 82. e1-. e5.  
28  
29 36. Scheifes A, Walraven S, Stolker JJ, Nijman HL, Egberts TC, Heerdink ER. Adverse events and  
30 the relation with quality of life in adults with intellectual disability and challenging behaviour using  
31 psychotropic drugs. *Research in developmental disabilities* 2016; **49**: 13-21.  
32  
33 37. Paton C, Bhatti S, Purandare K, Roy A, Barnes TRE. Quality of prescribing of antipsychotic  
34 medication for people with intellectual disability under the care of UK mental health services: a  
35 cross-sectional audit of clinical practice. *BMJ Open* 2016; **6**: e013116.  
36  
37 38. Sheehan R, Hassiotis A. Reduction or discontinuation of antipsychotics for challenging  
38 behaviour in adults with intellectual disability: a systematic review. *The Lancet Psychiatry* 2016; **4**:  
39 238-56.  
40  
41  
42  
43  
44  
45  
46  
47  
48  
49  
50  
51  
52  
53  
54  
55  
56  
57  
58  
59  
60

TABLE 1 – Cohort characteristics

|                                                                                      | ID cohort         | Non-ID cohort      |
|--------------------------------------------------------------------------------------|-------------------|--------------------|
| Total number (%)                                                                     | 9,039 (21)        | 34,242 (79)        |
| Male, <i>n</i> (%)                                                                   | 5,279 (58)        | 18,825 (55)        |
| Average age, <i>yrs</i> (SD)                                                         | 42 (16)           | 44 (16)            |
| Townsend score, <i>n</i> (%)                                                         |                   |                    |
| 1                                                                                    | 1,403 (16)        | 4,860 (14)         |
| 2                                                                                    | 1,752 (19)        | 5,119 (15)         |
| 3                                                                                    | 1,948 (22)        | 6,481 (19)         |
| 4                                                                                    | 1,942 (22)        | 8,189 (24)         |
| 5                                                                                    | 1,563 (17)        | 7,911 (23)         |
| Missing                                                                              | 417 (5)           | 1,619 (5)          |
| History of antipsychotic use at cohort entry, <i>n</i> (%)                           | 6,684 (74)        | 16,227 (47)        |
| History of movement disorder at cohort entry, <i>n</i> (%)                           | 2,192 (24)        | 4,946 (14)         |
| History of movement disorder without antipsychotic use at cohort entry, <i>n</i> (%) | 136/2,355 (6)     | 1,038/18,015 (6)   |
| History of movement disorder and antipsychotic use at cohort entry, <i>n</i> (%)     | 2,056/6,684 (31)  | 3,908/16,227 (24)  |
| Total person-years between first and last antipsychotic prescription                 | 44,696            | 104,014            |
| Median years between first and last prescription (IQR)                               | 3.5 (1.2 to 7.9)  | 1.3 (0.19 to 4.4)  |
| Median years on treatment between first and last prescription (IQR)                  | 2.6 (0.76 to 6.3) | 0.67 (0.15 to 2.5) |
| Average daily dose, <i>CLZE</i> (SD)                                                 | 135 (156)         | 139 (146)          |

CLZE, Chlorpromazine equivalents

**TABLE 2** – frequency of antipsychotic drugs prescribed in the intellectually disabled and non-intellectually disabled cohorts

| Antipsychotic drug | ID cohort |            |                        |                                | Non-ID cohort |            |                        |                                |
|--------------------|-----------|------------|------------------------|--------------------------------|---------------|------------|------------------------|--------------------------------|
|                    | Number    | Percentage | Average daily dose, mg | Median treatment duration, yrs | Number        | Percentage | Average daily dose, mg | Median treatment duration, yrs |
| Risperidone        | 4,013     | 28.5       | 1.9                    | 1.81                           | 7,426         | 14.7       | 2.2                    | 0.47                           |
| Olanzapine         | 2,086     | 14.8       | 8.2                    | 1.62                           | 10,246        | 20.3       | 8.5                    | 0.67                           |
| Chlorpromazine     | 1,770     | 12.6       | 78.5                   | 1.12                           | 5,274         | 10.5       | 64.8                   | 0.20                           |
| Quetiapine         | 1,295     | 9.2        | 154.1                  | 0.93                           | 7,693         | 15.2       | 152.6                  | 0.72                           |
| Haloperidol        | 1,231     | 8.7        | 4.9                    | 0.68                           | 3,755         | 7.5        | 3.2                    | 0.14                           |
| Thioridazine       | 838       | 6.0        | 77.9                   | 0.82                           | 2,672         | 5.3        | 49.8                   | 0.20                           |
| Aripiprazole       | 661       | 4.7        | 10.5                   | 0.74                           | 2,638         | 5.2        | 11.8                   | 0.54                           |
| Trifluoperazine    | 456       | 3.2        | 6.5                    | 1.06                           | 3,403         | 6.8        | 4.5                    | 0.19                           |
| Zuclopenthixol     | 429       | 3.1        | 18.7                   | 2.17                           | 340           | 0.7        | 20.0                   | 0.45                           |
| Amisulpride        | 327       | 2.3        | 295.0                  | 0.94                           | 1,687         | 3.4        | 290.3                  | 0.73                           |
| Promazine          | 276       | 2.0        | 58.4                   | 0.33                           | 1,688         | 3.4        | 58.6                   | 0.16                           |
| Sulpiride          | 276       | 2.0        | 437.8                  | 1.97                           | 1,199         | 2.4        | 435.6                  | 0.79                           |
| Other*             | 980       | 7.0        | -                      | -                              | 5,230         | 10.4       | -                      | -                              |

\*Other antipsychotic drugs prescribed to <1% of ID cohort each

**TABLE 3** – Incidence rates and adjusted incident rate ratios for movement side-effects in people with and without intellectual disability prescribed antipsychotic drugs

| Variable                                                                           | ID cohort                     |                              |                                           | Non-ID cohort                 |                              |                                           | Comparison                    |                  |
|------------------------------------------------------------------------------------|-------------------------------|------------------------------|-------------------------------------------|-------------------------------|------------------------------|-------------------------------------------|-------------------------------|------------------|
|                                                                                    | No of events during follow-up | No of Person-Years (X10,000) | Incidence per 10,000 Person-Years (95%CI) | No of events during follow-up | No of Person-Years (X10,000) | Incidence per 10,000 Person-Years (95%CI) | Incidence Rate Ratio* (95%CI) | p-value          |
| <b>Any movement disorder (defined by Read code or antimuscarinic prescription)</b> | <b>743</b>                    | <b>2.7</b>                   | <b>275 (256 to 296)</b>                   | <b>1750</b>                   | <b>7.0</b>                   | <b>248 (237 to 260)</b>                   | <b>1.30 (1.18 to 1.42)</b>    | <b>&lt;0.001</b> |
| <b>Any movement disorder (defined by Read code)</b>                                | <b>446</b>                    | <b>4.4</b>                   | <b>111 (101 to 122)</b>                   | <b>952</b>                    | <b>9.4</b>                   | <b>101 (95 to 108)</b>                    | <b>1.30 (1.16 to 1.47)</b>    | <b>&lt;0.001</b> |
| <b>Any movement disorder (defined by antimuscarinic prescription)</b>              | <b>564</b>                    | <b>2.9</b>                   | <b>196 (180 to 212)</b>                   | <b>1299</b>                   | <b>7.6</b>                   | <b>172 (163 to 181)</b>                   | <b>1.29 (1.16 to 1.44)</b>    | <b>&lt;0.001</b> |
| Acute dystonia                                                                     | 60                            | 4.4                          | 14 (11 to 18)                             | 161                           | 10.2                         | 16 (14 to 19)                             | 1.00 (0.73 to 1.37)           | 0.99             |
| <b>Akathisia</b>                                                                   | <b>80</b>                     | <b>4.5</b>                   | <b>18 (15 to 23)</b>                      | <b>112</b>                    | <b>10.3</b>                  | <b>11 (9 to 13)</b>                       | <b>2.29 (1.69 to 3.12)</b>    | <b>&lt;0.001</b> |
| <b>Parkinsonism</b>                                                                | <b>270</b>                    | <b>4.4</b>                   | <b>64 (57 to 72)</b>                      | <b>592</b>                    | <b>9.9</b>                   | <b>60 (55 to 65)</b>                      | <b>1.20 (1.03 to 1.39)</b>    | <b>0.02</b>      |
| Tardive dyskinesia                                                                 | 61                            | 4.0                          | 14 (11 to 18)                             | 123                           | 10.3                         | 12 (10 to 14)                             | 1.27 (0.91 to 1.75)           | 0.16             |
| <b>Neuroleptic malignant syndrome</b>                                              | <b>11</b>                     | <b>4.4</b>                   | <b>3 (1 to 5)</b>                         | <b>12</b>                     | <b>10.4</b>                  | <b>1 (1-2)</b>                            | <b>3.03 (1.26 to 7.30)</b>    | <b>0.013</b>     |
| Other movement disorder                                                            | 43                            | 4.2                          | 10 (7 to 13)                              | 94                            | 10.3                         | 9 (7-11)                                  | 1.26 (0.86 to 1.85)           | 0.23             |

\*Adjusted for sex, social deprivation score, time period, history of antipsychotic drug use, average daily dose, days on treatment

**TABLE 4** – Sensitivity analysis with incidence rates and adjusted incident rate ratios for movement side-effects in people with and without intellectual disability prescribed first- and second-generation antipsychotic drugs

| Antipsychotic class        | ID cohort                     |                              |                                           | Non-ID cohort                 |                              |                                           | Comparison                    |                  |
|----------------------------|-------------------------------|------------------------------|-------------------------------------------|-------------------------------|------------------------------|-------------------------------------------|-------------------------------|------------------|
|                            | No of events during follow-up | No of Person-Years (X10,000) | Incidence per 10,000 Person-Years (95%CI) | No of events during follow-up | No of Person-Years (X10,000) | Incidence per 10,000 Person-Years (95%CI) | Incidence Rate Ratio* (95%CI) | p-value          |
| <b>First generation**</b>  | <b>247</b>                    | <b>0.8</b>                   | <b>320 (283 to 362)</b>                   | <b>569</b>                    | <b>1.9</b>                   | <b>293 (270 to 318)</b>                   | <b>1.36 (1.16 to 1.60)</b>    | <b>&lt;0.001</b> |
| <b>Second generation**</b> | <b>378</b>                    | <b>1.6</b>                   | <b>241 (218 to 267)</b>                   | <b>948</b>                    | <b>4.3</b>                   | <b>219 (206 to 233)</b>                   | <b>1.43 (1.26 to 1.62)</b>    | <b>&lt;0.001</b> |
| <b>Risperidone**</b>       | <b>124</b>                    | <b>0.6</b>                   | <b>196 (164 to 233)</b>                   | <b>96</b>                     | <b>0.5</b>                   | <b>182 (149 to 223)</b>                   | <b>1.55 (1.15 to 2.08)</b>    | <b>0.004</b>     |

\*Adjusted for sex, social deprivation score, time period, history of antipsychotic drug use, average daily dose, days on treatment

\*\* Restricted to periods when people were exclusively prescribed first- or second-generation antipsychotic drugs or risperidone

1  
2  
3 Figure legends  
4

5 Figure 1a and figure 1b  
6

7  
8 Time trends in crude incidence rates of a) movement side-effect defined by Read code and  
9 b) antimuscarinic drug prescription in people with and without intellectual disability  
10 prescribed antipsychotic drugs  
11  
12  
13  
14  
15  
16  
17  
18  
19  
20  
21  
22  
23  
24  
25  
26  
27  
28  
29  
30  
31  
32  
33  
34  
35  
36  
37  
38  
39  
40  
41  
42  
43  
44  
45  
46  
47  
48  
49  
50  
51  
52  
53  
54  
55  
56  
57  
58  
59  
60

1  
2  
3  
4  
5  
6  
7  
8  
9  
10  
11  
12  
13  
14  
15  
16  
17  
18  
19  
20  
21  
22  
23  
24  
25  
26  
27  
28  
29  
30  
31  
32  
33  
34  
35  
36  
37  
38  
39  
40  
41  
42  
43  
44  
45  
46  
47  
48  
49  
50  
51  
52  
53  
54  
55  
56  
57  
58  
59  
60

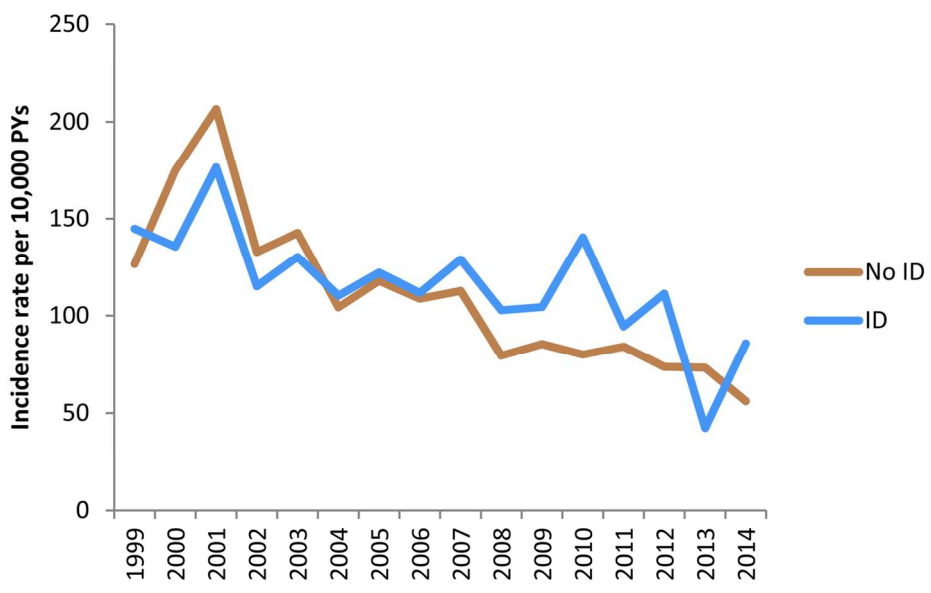

Caption : Time trends in crude incidence rates of a) movement side-effect defined by Read code and b) antimuscarinic drug prescription in people with and without intellectual disability prescribed antipsychotic drugs

129x88mm (300 x 300 DPI)

Review only



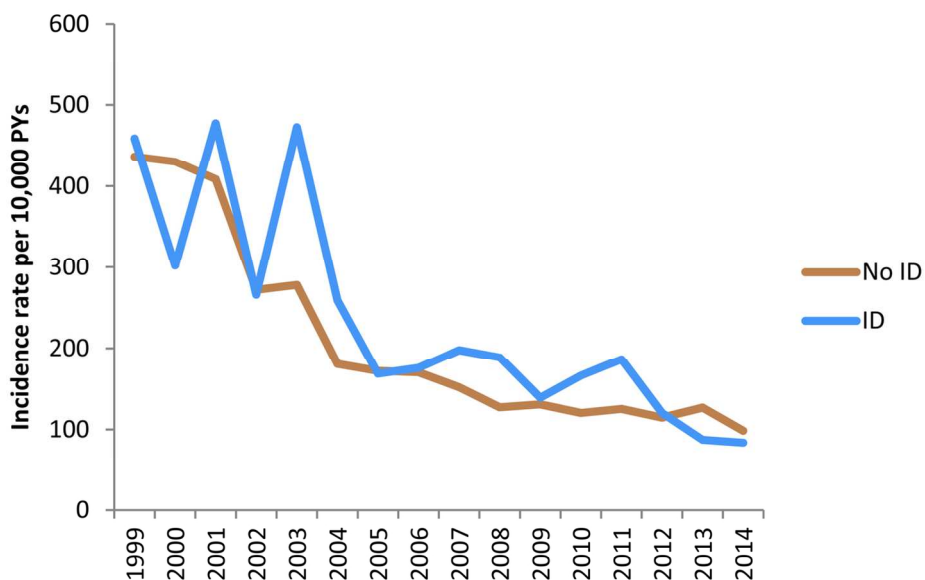

Caption : Time trends in crude incidence rates of a) movement side-effect defined by Read code and b) antimuscarinic drug prescription in people with and without intellectual disability prescribed antipsychotic drugs

131x90mm (300 x 300 DPI)

ew only

Movement side-effects of antipsychotic drugs in adults with and without intellectual disability: UK population-based cohort study

Sheehan R, Horsfall L, Strydom A, Osborn D, Walters K, Hassiotis A

## **Antipsychotic movement side-effects by type**

### **Acute dystonia**

16A3.00 Wry neck/torticollis  
16A3.11 Torticollis - symptom  
1B25.00 Has "spasms"  
1B25.11 Spasms - symptom  
1B35.00 Attacks of rigidity  
1B36.00 Trismus present  
22B2.00 O/E - carpopedal spasm  
2942000 Trismus  
2974.00 O/E - spasm/tic  
2974.11 O/E - spasm  
7Q04000 Torsion dystonias other involuntary movements drugs band 1  
F137.00 Symptomatic torsion dystonia  
F137200 Drug-induced dystonia  
F137y00 Other specified symptomatic torsion dystonia  
F137z00 Symptomatic torsion dystonia NOS  
F138.00 Fragments of torsion dystonia  
F138000 Blepharospasm  
F138200 Spasmodic torticollis  
F13X.00 Dystonia, unspecified  
F4Jy911 Oculogyric crisis  
Fyu2400 [X]Other dystonia  
Fyu2A00 [X]Dystonia, unspecified  
N135.00 Torticollis unspecified  
N135000 Intermittent torticollis  
N135z00 Torticollis NOS  
R010200 [D]Spasms NOS  
R010600 [D] Trismus  
R017000 [D]Carpopedal spasm

### **Pseudo-Parkinsonism**

1B22.00 Has a tremor  
1B22.11 Tremor symptom  
1B22.12 Shaking  
1B23.00 Trembles  
1B23.11 Trembles - symptom  
294..11 O/E - rigid muscle  
2942.00 O/E - muscle tone hypertonic  
2944.00 O/E - muscle rigid - cogwheel  
2944.11 O/E - cog wheel rigidity

Movement side-effects of antipsychotic drugs in adults with and without intellectual disability: UK population-based cohort study

Sheehan R, Horsfall L, Strydom A, Osborn D, Walters K, Hassiotis A

297A.00 O/E - Parkinsonian tremor  
 2987.00 O/E -Parkinson flexion posture  
 2987.11 O/E - Parkinson posture  
 2994.00 O/E-festination-Parkinson gait  
 2994.11 O/E - Parkinson gait  
 F121.00 Parkinsonism secondary to drugs  
 F121.11 Drug induced parkinsonism  
 F12W.00 Secondary parkinsonism due to other external agents  
 F12X.00 Secondary parkinsonism, unspecified  
 F131200 Drug-induced tremor  
 Fyu2000 [X]Other drug-induced secondary parkinsonism  
 Fyu2100 [X]Other secondary parkinsonism  
 Fyu2900 [X]Secondary parkinsonism, unspecified  
 R010300 [D]Tremor NOS  
 Fyu2B00 [X]Secondary parkinsonism due to other external agents

### **Akathisia**

1B10.00 Restless  
 1P04.00 C/O - akathisia

### **Tardive dyskinesia**

F138100 Orofacial dyskinesia  
 F138111 Tardive dyskinesia  
 297..00 O/E - involuntary movements  
 297Z.00 O/E - involuntary movement NOS  
 1B2..00 Involuntary movement symptom  
 1B2Z.00 Involuntary movemt.symptom NOS  
 R010.00 [D]Abnormal involuntary movements  
 R010z00 [D]Abnormal involuntary movement NOS  
 Ryu3000 [X]Other and unspecified abnormal involuntary movements  
 1B2Z.00 Involuntary movemt.symptom NOS  
 1B2..00 Involuntary movement symptom

### **Other/misc.**

Fyu2700 [X]Other specified extrapyramidal and movement disorders  
 R013.11 [D]Dyskinesia  
 F13z.00 Other/unspecified extrapyramidal/abnormal movement disorders  
 F13z000 Unspecified extrapyramidal disease  
 F13zz00 Extrapyramidal disease and abnormal movement disorder NOS  
 Fyu2.00 [X]Extrapyramidal and movement disorders  
 29M..00 Extrapyramidal movements  
 F13..00 Other extrapyramidal disease and abnormal movement disorders

Movement side-effects of antipsychotic drugs in adults with and without intellectual disability: UK population-based cohort study

Sheehan R, Horsfall L, Strydom A, Osborn D, Walters K, Hassiotis A  
F13..11 Extrapyramidal disease excluding Parkinson's disease  
ZS42500 Extrapyramidal dysarthria

**Neuroleptic malignant syndrome**

F122.00 Malignant neuroleptic syndrome

For peer review only

1  
2  
3  
4  
5  
6  
7  
8  
9  
10  
11  
12  
13  
14  
15  
16  
17  
18  
19  
20  
21  
22  
23  
24  
25  
26  
27  
28  
29  
30  
31  
32  
33  
34  
35  
36  
37  
38  
39  
40  
41  
42  
43  
44  
45  
46  
47  
48  
49  
50  
51  
52  
53  
54  
55  
56  
57  
58  
59  
60

STROBE Statement—checklist of items that should be included in reports of observational studies

### Movement side-effects of antipsychotic drugs in adults with intellectual disability

|                           | Item No. | Recommendation                                                                                                                                                                                                                                                                                                                                                                                                                                            | Page No. | Relevant text from manuscript                                                                                                                                                |
|---------------------------|----------|-----------------------------------------------------------------------------------------------------------------------------------------------------------------------------------------------------------------------------------------------------------------------------------------------------------------------------------------------------------------------------------------------------------------------------------------------------------|----------|------------------------------------------------------------------------------------------------------------------------------------------------------------------------------|
| <b>Title and abstract</b> | 1        | (a) Indicate the study's design with a commonly used term in the title or the abstract                                                                                                                                                                                                                                                                                                                                                                    | 1        | Cohort study in title                                                                                                                                                        |
|                           |          | (b) Provide in the abstract an informative and balanced summary of what was done and what was found                                                                                                                                                                                                                                                                                                                                                       | 2        |                                                                                                                                                                              |
| <b>Introduction</b>       |          |                                                                                                                                                                                                                                                                                                                                                                                                                                                           |          |                                                                                                                                                                              |
| Background/rationale      | 2        | Explain the scientific background and rationale for the investigation being reported                                                                                                                                                                                                                                                                                                                                                                      | 6        | “People with ID are often considered to be at greater risk of antipsychotic drug-induced movement side-effects than people without ID but no studies directly compare rates” |
| Objectives                | 3        | State specific objectives, including any prespecified hypotheses                                                                                                                                                                                                                                                                                                                                                                                          | 7        | “To compare the incidence of recorded movement side-effects in adults with and without ID who were prescribed antipsychotic drugs”.                                          |
| <b>Methods</b>            |          |                                                                                                                                                                                                                                                                                                                                                                                                                                                           |          |                                                                                                                                                                              |
| Study design              | 4        | Present key elements of study design early in the paper                                                                                                                                                                                                                                                                                                                                                                                                   | 7-9      | Data source, study cohort, covariates subheadings                                                                                                                            |
| Setting                   | 5        | Describe the setting, locations, and relevant dates, including periods of recruitment, exposure, follow-up, and data collection                                                                                                                                                                                                                                                                                                                           | 7-8      | Study cohort subheading                                                                                                                                                      |
| Participants              | 6        | (a) <i>Cohort study</i> —Give the eligibility criteria, and the sources and methods of selection of participants. Describe methods of follow-up<br><i>Case-control study</i> —Give the eligibility criteria, and the sources and methods of case ascertainment and control selection. Give the rationale for the choice of cases and controls<br><i>Cross-sectional study</i> —Give the eligibility criteria, and the sources and methods of selection of | 7-8      | Study cohort subheading<br>“all adults with ID... were extracted”                                                                                                            |

1  
2  
3  
4  
5  
6  
7  
8  
9  
10  
11  
12  
13  
14  
15  
16  
17  
18  
19  
20  
21  
22  
23  
24  
25  
26  
27  
28  
29  
30  
31  
32  
33  
34  
35  
36  
37  
38  
39  
40  
41  
42  
43  
44  
45  
46  
47  
48  
49

|                           |    |                                                                                                                                                                                      |     |                                                                                                                     |
|---------------------------|----|--------------------------------------------------------------------------------------------------------------------------------------------------------------------------------------|-----|---------------------------------------------------------------------------------------------------------------------|
|                           |    | participants                                                                                                                                                                         |     |                                                                                                                     |
|                           |    | (b) Cohort study—For matched studies, give matching criteria and number of exposed and unexposed                                                                                     | 8   | “A comparison cohort... was extracted using stratified sampling within each GP practice with frequency matching...” |
|                           |    | Case-control study—For matched studies, give matching criteria and the number of controls per case                                                                                   |     |                                                                                                                     |
| Variables                 | 7  | Clearly define all outcomes, exposures, predictors, potential confounders, and effect modifiers. Give diagnostic criteria, if applicable                                             | 7-9 | Read code lists described<br>Covariates described                                                                   |
| Data sources/ measurement | 8* | For each variable of interest, give sources of data and details of methods of assessment (measurement). Describe comparability of assessment methods if there is more than one group | 7   | Data source subheading                                                                                              |
| Bias                      | 9  | Describe any efforts to address potential sources of bias                                                                                                                            | 8   | “Comparison cohort matched to ensure similar population level characteristics across the two groups”                |
| Study size                | 10 | Explain how the study size was arrived at                                                                                                                                            | 7   | “All adults with recorded ID”                                                                                       |

Continued on next page

|                        |     |                                                                                                                                                                                                                                                                                                           |         |                                                                                                                  |
|------------------------|-----|-----------------------------------------------------------------------------------------------------------------------------------------------------------------------------------------------------------------------------------------------------------------------------------------------------------|---------|------------------------------------------------------------------------------------------------------------------|
| Quantitative variables | 11  | Explain how quantitative variables were handled in the analyses. If applicable, describe which groupings were chosen and why                                                                                                                                                                              | 9       | Statistical analysis subheading                                                                                  |
| Statistical methods    | 12  | (a) Describe all statistical methods, including those used to control for confounding                                                                                                                                                                                                                     | 9       | “Multivariable mixed Poisson regression was used...”                                                             |
|                        |     | (b) Describe any methods used to examine subgroups and interactions                                                                                                                                                                                                                                       |         |                                                                                                                  |
|                        |     | (c) Explain how missing data were addressed                                                                                                                                                                                                                                                               | 9       | “It was not possible to estimate the daily dose for 5% of prescriptions and these were excluded from the study”. |
|                        |     | (d) <i>Cohort study</i> —If applicable, explain how loss to follow-up was addressed<br><i>Case-control study</i> —If applicable, explain how matching of cases and controls was addressed<br><i>Cross-sectional study</i> —If applicable, describe analytical methods taking account of sampling strategy | NA      |                                                                                                                  |
|                        |     | (e) Describe any sensitivity analyses                                                                                                                                                                                                                                                                     | 9       | “We conducted a sensitivity analysis...”                                                                         |
| <b>Results</b>         |     |                                                                                                                                                                                                                                                                                                           |         |                                                                                                                  |
| Participants           | 13* | (a) Report numbers of individuals at each stage of study—eg numbers potentially eligible, examined for eligibility, confirmed eligible, included in the study, completing follow-up, and analysed                                                                                                         | NA      |                                                                                                                  |
|                        |     | (b) Give reasons for non-participation at each stage                                                                                                                                                                                                                                                      | NA      |                                                                                                                  |
|                        |     | (c) Consider use of a flow diagram                                                                                                                                                                                                                                                                        | NA      |                                                                                                                  |
| Descriptive data       | 14* | (a) Give characteristics of study participants (eg demographic, clinical, social) and information on exposures and potential confounders                                                                                                                                                                  | 10      | Table 1                                                                                                          |
|                        |     | (b) Indicate number of participants with missing data for each variable of interest                                                                                                                                                                                                                       |         |                                                                                                                  |
|                        |     | (c) <i>Cohort study</i> —Summarise follow-up time (eg, average and total amount)                                                                                                                                                                                                                          | Table 1 | Total person years between first and last prescription, median years between first and last prescription         |
| Outcome data           | 15* | <i>Cohort study</i> —Report numbers of outcome events or summary measures over time                                                                                                                                                                                                                       | 10      | “The overall incidence of recorded movement side effects...”                                                     |
|                        |     | <i>Case-control study</i> —Report numbers in each exposure category, or summary measures of exposure                                                                                                                                                                                                      | Table 3 |                                                                                                                  |
|                        |     | <i>Cross-sectional study</i> —Report numbers of outcome events or summary measures                                                                                                                                                                                                                        | NA      |                                                                                                                  |
| Main results           | 16  | (a) Give unadjusted estimates and, if applicable, confounder-adjusted estimates and their precision                                                                                                                                                                                                       | 10      |                                                                                                                  |

1  
2  
3  
4  
5  
6  
7  
8  
9  
10  
11  
12  
13  
14  
15  
16  
17  
18  
19  
20  
21  
22  
23  
24  
25  
26  
27  
28  
29  
30  
31  
32  
33  
34  
35  
36  
37  
38  
39  
40  
41  
42  
43  
44  
45  
46  
47  
48  
49

---

|                                                                                                                  |         |
|------------------------------------------------------------------------------------------------------------------|---------|
| (eg, 95% confidence interval). Make clear which confounders were adjusted for and why they were included         | Table 2 |
| (b) Report category boundaries when continuous variables were categorized                                        | NA      |
| (c) If relevant, consider translating estimates of relative risk into absolute risk for a meaningful time period |         |

---

Continued on next page

For peer review only



|                          |    |                                                                                                                                                                            |               |                                                                                                                                                      |
|--------------------------|----|----------------------------------------------------------------------------------------------------------------------------------------------------------------------------|---------------|------------------------------------------------------------------------------------------------------------------------------------------------------|
| Other analyses           | 17 | Report other analyses done—eg analyses of subgroups and interactions, and sensitivity analyses                                                                             | 11<br>Table 4 | “Analysis restricted to periods when people were exclusively prescribed first- or second-generation antipsychotic drugs did not change the results”. |
| <b>Discussion</b>        |    |                                                                                                                                                                            |               |                                                                                                                                                      |
| Key results              | 18 | Summarise key results with reference to study objectives                                                                                                                   | 11            | “Our data suggest that people with ID are indeed more likely to experience movement side-effects of antipsychotic drugs”.                            |
| Limitations              | 19 | Discuss limitations of the study, taking into account sources of potential bias or imprecision. Discuss both direction and magnitude of any potential bias                 | 14-15         |                                                                                                                                                      |
| Interpretation           | 20 | Give a cautious overall interpretation of results considering objectives, limitations, multiplicity of analyses, results from similar studies, and other relevant evidence | 15            | “People with ID appear more susceptible to movement side-effects of antipsychotic drugs than people without ID”.                                     |
| Generalisability         | 21 | Discuss the generalisability (external validity) of the study results                                                                                                      |               |                                                                                                                                                      |
| <b>Other information</b> |    |                                                                                                                                                                            |               |                                                                                                                                                      |
| Funding                  | 22 | Give the source of funding and the role of the funders for the present study and, if applicable, for the original study on which the present article is based              | 5             | “The Baily Thomas Charitable Fund and the National Institute for Health Research”                                                                    |

\*Give information separately for cases and controls in case-control studies and, if applicable, for exposed and unexposed groups in cohort and cross-sectional studies.

**Note:** An Explanation and Elaboration article discusses each checklist item and gives methodological background and published examples of transparent reporting. The STROBE checklist is best used in conjunction with this article (freely available on the Web sites of PLoS Medicine at <http://www.plosmedicine.org/>, Annals of Internal Medicine at <http://www.annals.org/>, and Epidemiology at <http://www.epidem.com/>). Information on the STROBE Initiative is available at [www.strobe-statement.org](http://www.strobe-statement.org).
